# Supplementary material for: Mining of candidate genes involved in the biosynthesis of dextrorotatory borneol in Cinnamomum burmannii by transcriptomic analysis on three chemotypes
Source: PeerJ. 2020 Jun 10;8:e9311. doi: 10.7717/peerj.9311 (PMC7293187; doi:10.7717/peerj.9311)
Supplement: Data S1 [file peerj-08-9311-s001.xlsx]

## Sheet: Sheet1
Unigene ID	Rename	Forward primer(5'-3')	Reverse primer(5'-3')
c122670.graph_c0	CbTPS2	GAAGAGCCGATTACAAGC	GAGCCAATGGGTTCACAG
c129067.graph_c0	CbTPS3	CTGTCAATAGATGGGACCCT	GGGAGTTTATCGGATTCCATC
c117157.graph_c0	CbGPPS_5	TGCCGAACACCAGAAAG	CTCCCAGAAGACAGAAGTAAAT
c84883.graph_c0	CbDXR	TAGCTTGTACCCTGGTTCCT	CTTGGGCTGATTGAGTTGTG
c126058.graph_c0	CbDXS_1	GCTACAGCCGCTGCCATAAA	AAGAGCAACCCGTTCACCCT
c134634.graph_c0	CbDXS_3	CAAGTTCCGCCAGCTTCGTG	CCATTCCCGCTTATCATTCC
c134509.graph_c0	CbHDS_1	TTCAAGCATACCGCTTACTG	TTCATCCGTCCATCCTCACC
c121089.graph_c0	CbHDR	CTCATGTTAGTGGTTGGTGGAT	TTGTGATGGGACCTTCTGGT
c133256.graph_c0	CbHMGR_1	AGGTTTCAGGAGGGTCAA	CGGTGCTCCATCAGTTTC
c121493.graph_c0	CbTubulin	GAACGCTTGTCGGTAGATT	GGAGGGAGTGAGTGGATAG
c130684.graph_c1	CbAP18/ERF-1	CTCCCGCCGTCTCAATCCAA	GCGCCGCATTAGCAACCAAA
c117041.graph_c0	CbbHLH-1	ATTTGCTCATTGGGTTGCTC	TGCCACGTCACATACTGCTC
c127743.graph_c0	CbbHLH-2	CAAGCATCTATTATTGGTGGTG	AAGGGAGGAAACAAAGGAGT
c120253.graph_c0	CbMYB-1	GCAAGGCAAGCACTATGTGA	GTAGAGGATGATTGGGTCGA
c123637.graph_c0	CbMYB-2	ACCTATTTCTGATGCGACTG	AGACAGGAATTGGACGAAGA
c122191.graph_c0	CbWRKY-1	ATGAAGGCAACCACAACCAC	TGATGAGCAAGGCAAGAGGG
