# Supplementary material for: Mining of candidate genes involved in the biosynthesis of dextrorotatory borneol in Cinnamomum burmannii by transcriptomic analysis on three chemotypes
Source: PeerJ. 2020 Jun 10;8:e9311. doi: 10.7717/peerj.9311 (PMC7293187; doi:10.7717/peerj.9311)
Supplement: Data S3 [file peerj-08-9311-s003.xlsx]

## Sheet: Sheet1
Group	Sample	content(mg/g)	Average content(mg/g)	SD
HBT	HBT-1	1.6436	1.67731	0.0524375
	HBT-2	1.73772
	HBT-3	1.6506
LBT	LBT-1	0.760821	0.804759	0.03813
	LBT-2	0.824282
	LBT-3	0.829174
BFT	BFT-1	0	0	0
	BFT-2	0
	BFT-3	0
