# Supplementary material for: Mining of candidate genes involved in the biosynthesis of dextrorotatory borneol in Cinnamomum burmannii by transcriptomic analysis on three chemotypes
Source: PeerJ. 2020 Jun 10;8:e9311. doi: 10.7717/peerj.9311 (PMC7293187; doi:10.7717/peerj.9311)
Supplement: Data S9 [file peerj-08-9311-s009.xlsx]

## Sheet: Sheet1
GO_ID	GO_Term	DEGs	P_value	Type	Unigene ID
GO:0004674	protein serine/threonine kinase activity	114	5.2e-20	MF	c100878.graph_c0;c101170.graph_c1;c101614.graph_c0;c101686.graph_c0;c101686.graph_c1;c103748.graph_c0;c104110.graph_c0;c104420.graph_c0;c104507.graph_c0;c104561.graph_c0;c106838.graph_c0;c109977.graph_c0;c111122.graph_c0;c111626.graph_c0;c111992.graph_c2;c112749.graph_c0;c112778.graph_c0;c113327.graph_c0;c113329.graph_c0;c115136.graph_c0;c116679.graph_c0;c116679.graph_c1;c116846.graph_c0;c117010.…
GO:0004672	protein kinase activity	216	8.1e-14	MF	c100878.graph_c0;c101170.graph_c1;c101614.graph_c0;c101686.graph_c0;c101686.graph_c1;c101900.graph_c0;c103748.graph_c0;c104110.graph_c0;c104420.graph_c0;c104507.graph_c0;c104561.graph_c0;c106838.graph_c0;c108728.graph_c0;c108728.graph_c1;c109977.graph_c0;c111122.graph_c0;c111626.graph_c0;c111670.graph_c0;c111992.graph_c2;c112365.graph_c0;c112469.graph_c1;c112749.graph_c0;c112778.graph_c0;c113327.…
GO:0008017	microtubule binding	28	7.7e-09	MF	c102079.graph_c1;c103386.graph_c0;c106921.graph_c0;c114448.graph_c0;c115862.graph_c1;c116573.graph_c1;c124681.graph_c4;c125814.graph_c0;c126471.graph_c0;c127533.graph_c0;c128910.graph_c1;c129597.graph_c0;c130571.graph_c0;c132151.graph_c0;c132278.graph_c0;c132509.graph_c0;c133059.graph_c0;c133258.graph_c0;c133640.graph_c1;c134612.graph_c0;c134791.graph_c0;c134909.graph_c0;c136529.graph_c0;c136811.…
GO:0030599	pectinesterase activity	21	6.1e-07	MF	c110434.graph_c0;c117515.graph_c0;c120081.graph_c0;c121515.graph_c0;c121933.graph_c0;c122320.graph_c0;c122875.graph_c0;c122875.graph_c1;c122875.graph_c2;c124079.graph_c0;c124186.graph_c1;c127639.graph_c2;c129689.graph_c1;c130429.graph_c0;c130954.graph_c0;c132288.graph_c2;c135262.graph_c0;c135617.graph_c0;c136104.graph_c0;c138648.graph_c0;c68834.graph_c0
GO:0016760	cellulose synthase (UDP-forming) activity	14	6.1e-07	MF	c108625.graph_c0;c116412.graph_c0;c116412.graph_c1;c118196.graph_c0;c124161.graph_c0;c128318.graph_c0;c131595.graph_c0;c133457.graph_c0;c134054.graph_c1;c137016.graph_c0;c67743.graph_c0;c68914.graph_c0;c83063.graph_c0;c91199.graph_c1
GO:0008757	S-adenosylmethionine-dependent methyltransferase activity	29	2.6e-06	MF	c101307.graph_c0;c104070.graph_c0;c105516.graph_c0;c114302.graph_c4;c115829.graph_c1;c118021.graph_c0;c119853.graph_c0;c124026.graph_c1;c124781.graph_c0;c125214.graph_c0;c125240.graph_c0;c126752.graph_c0;c131408.graph_c0;c131922.graph_c0;c132279.graph_c0;c132779.graph_c0;c133011.graph_c0;c133423.graph_c0;c133434.graph_c0;c134942.graph_c0;c136478.graph_c3;c136744.graph_c1;c138491.graph_c0;c138884.…
GO:0008378	galactosyltransferase activity	8	3.2e-06	MF	c106062.graph_c1;c114016.graph_c0;c114635.graph_c1;c114635.graph_c2;c122757.graph_c0;c129299.graph_c0;c132214.graph_c0;c67667.graph_c0
GO:0032440	2-alkenal reductase [NAD(P)] activity	21	4.5e-06	MF	c101439.graph_c0;c106838.graph_c0;c109317.graph_c0;c113966.graph_c0;c118272.graph_c0;c119871.graph_c0;c120518.graph_c0;c120832.graph_c0;c124374.graph_c0;c124504.graph_c1;c126806.graph_c0;c127328.graph_c0;c130686.graph_c1;c130717.graph_c1;c131315.graph_c0;c132891.graph_c0;c132891.graph_c1;c134196.graph_c0;c134334.graph_c1;c68446.graph_c0;c88560.graph_c0
GO:0080044	quercetin 7-O-glucosyltransferase activity	13	8.3e-06	MF	c113684.graph_c0;c113684.graph_c2;c113776.graph_c1;c118638.graph_c0;c120876.graph_c0;c126377.graph_c0;c126546.graph_c0;c133582.graph_c1;c136944.graph_c0;c137011.graph_c0;c68678.graph_c0;c84056.graph_c0;c94335.graph_c0
GO:0010333	terpene synthase activity	11	1.1e-05	MF	c111262.graph_c0;c122670.graph_c0;c129067.graph_c0;c130367.graph_c0;c132048.graph_c0;c132709.graph_c0;c135931.graph_c0;c136512.graph_c0;c137718.graph_c0;c137718.graph_c2;c69804.graph_c1
GO:0042349	guiding stereospecific synthesis activity	7	1.3e-05	MF	c110642.graph_c0;c113197.graph_c0;c119914.graph_c0;c124632.graph_c0;c138982.graph_c0;c67678.graph_c0;c95713.graph_c0
GO:0080043	quercetin 3-O-glucosyltransferase activity	13	2.2e-05	MF	c113684.graph_c0;c113684.graph_c2;c113776.graph_c1;c118638.graph_c0;c120876.graph_c0;c126377.graph_c0;c126546.graph_c0;c133582.graph_c1;c136944.graph_c0;c137011.graph_c0;c68678.graph_c0;c84056.graph_c0;c94335.graph_c0
GO:0008194	UDP-glycosyltransferase activity	57	2.6e-05	MF	c101674.graph_c0;c101674.graph_c1;c106062.graph_c1;c108625.graph_c0;c109640.graph_c0;c109967.graph_c0;c113684.graph_c0;c113684.graph_c2;c113776.graph_c1;c116412.graph_c0;c116412.graph_c1;c116525.graph_c0;c118196.graph_c0;c118638.graph_c0;c118884.graph_c1;c118984.graph_c0;c120337.graph_c0;c120772.graph_c0;c120772.graph_c1;c120876.graph_c0;c121583.graph_c0;c123492.graph_c0;c124161.graph_c0;c126096.…
GO:0016168	chlorophyll binding	14	5.8e-05	MF	c111152.graph_c0;c111429.graph_c0;c111971.graph_c0;c124837.graph_c0;c129146.graph_c0;c131334.graph_c0;c132561.graph_c0;c132561.graph_c2;c134486.graph_c0;c135031.graph_c0;c135031.graph_c1;c135628.graph_c0;c81752.graph_c0;c81752.graph_c2
GO:0061630	ubiquitin protein ligase activity	12	6.5e-05	MF	c103923.graph_c0;c114497.graph_c0;c123391.graph_c0;c124699.graph_c1;c128935.graph_c0;c129388.graph_c0;c130139.graph_c0;c130207.graph_c0;c130376.graph_c1;c131652.graph_c0;c134874.graph_c0;c91433.graph_c0
GO:0031409	pigment binding	13	0.00014	MF	c111152.graph_c0;c111429.graph_c0;c111971.graph_c0;c124837.graph_c0;c129146.graph_c0;c131334.graph_c0;c132561.graph_c0;c132561.graph_c2;c134486.graph_c0;c135031.graph_c0;c135031.graph_c1;c135628.graph_c0;c81752.graph_c2
GO:0008964	phosphoenolpyruvate carboxylase activity	1	0.00017	MF	c137612.graph_c0
GO:0030145	manganese ion binding	10	0.00025	MF	c111262.graph_c0;c111951.graph_c0;c122011.graph_c0;c122471.graph_c0;c133035.graph_c0;c138950.graph_c0;c139014.graph_c0;c139433.graph_c0;c69094.graph_c0;c69804.graph_c1
GO:0004197	cysteine-type endopeptidase activity	9	0.00035	MF	c101439.graph_c0;c113371.graph_c0;c121375.graph_c1;c128721.graph_c0;c133171.graph_c1;c134087.graph_c0;c138094.graph_c0;c82381.graph_c0;c94339.graph_c0
GO:0016722	oxidoreductase activity, oxidizing metal ions	16	0.00038	MF	c100905.graph_c0;c116114.graph_c0;c116265.graph_c0;c123523.graph_c0;c125377.graph_c0;c126163.graph_c0;c126288.graph_c0;c129013.graph_c1;c131292.graph_c0;c131292.graph_c1;c132136.graph_c2;c132296.graph_c0;c133338.graph_c0;c135408.graph_c0;c136104.graph_c0;c68993.graph_c0
GO:0008568	microtubule-severing ATPase activity	3	0.00042	MF	c122096.graph_c3;c123570.graph_c0;c126090.graph_c0
GO:0005507	copper ion binding	34	0.00046	MF	c100905.graph_c0;c101457.graph_c0;c103015.graph_c0;c112593.graph_c0;c116265.graph_c0;c119526.graph_c1;c120207.graph_c0;c121231.graph_c0;c121350.graph_c0;c123523.graph_c0;c125377.graph_c0;c126163.graph_c0;c126611.graph_c0;c127781.graph_c1;c128034.graph_c0;c128481.graph_c0;c129013.graph_c1;c131292.graph_c0;c131292.graph_c1;c132041.graph_c1;c132296.graph_c0;c133338.graph_c0;c133382.graph_c0;c133420.…
GO:0030247	polysaccharide binding	24	0.00048	MF	c112092.graph_c0;c113548.graph_c1;c116849.graph_c0;c117759.graph_c0;c119219.graph_c0;c123991.graph_c0;c124168.graph_c1;c124297.graph_c0;c125926.graph_c0;c126249.graph_c0;c126704.graph_c0;c127682.graph_c0;c128094.graph_c0;c128104.graph_c0;c131371.graph_c0;c131724.graph_c0;c132503.graph_c0;c135804.graph_c0;c65643.graph_c0;c65756.graph_c0;c69086.graph_c0;c69118.graph_c0;c85215.graph_c0;c86432.graph_…
GO:0046910	pectinesterase inhibitor activity	11	0.0005	MF	c110434.graph_c0;c120081.graph_c0;c121933.graph_c0;c122320.graph_c0;c124186.graph_c1;c127639.graph_c2;c130954.graph_c0;c135262.graph_c0;c135617.graph_c0;c138648.graph_c0;c68834.graph_c0
GO:0005509	calcium ion binding	48	0.00052	MF	c101686.graph_c0;c101686.graph_c1;c104974.graph_c0;c104974.graph_c1;c111848.graph_c3;c112593.graph_c0;c113453.graph_c0;c115847.graph_c0;c116986.graph_c1;c119871.graph_c0;c120001.graph_c1;c120001.graph_c2;c120359.graph_c0;c121205.graph_c0;c121788.graph_c0;c122058.graph_c0;c122880.graph_c0;c123746.graph_c0;c123844.graph_c0;c124027.graph_c0;c124027.graph_c1;c124255.graph_c1;c124747.graph_c1;c125616.…
GO:0050321	tau-protein kinase activity	4	0.00059	MF	c118272.graph_c0;c126521.graph_c2;c130717.graph_c1;c68446.graph_c0
GO:0005200	structural constituent of cytoskeleton	17	0.00085	MF	c100476.graph_c0;c118757.graph_c0;c120267.graph_c1;c120604.graph_c0;c128718.graph_c0;c129590.graph_c0;c130135.graph_c0;c131828.graph_c0;c135276.graph_c1;c136563.graph_c0;c137033.graph_c2;c141347.graph_c0;c68838.graph_c0;c68988.graph_c0;c83759.graph_c1;c83759.graph_c2;c84349.graph_c0
GO:0004568	chitinase activity	9	0.00101	MF	c106034.graph_c0;c106034.graph_c2;c111144.graph_c0;c120779.graph_c0;c125425.graph_c1;c127067.graph_c0;c136667.graph_c1;c75446.graph_c0;c80643.graph_c1
GO:0031418	L-ascorbic acid binding	3	0.00107	MF	c108903.graph_c0;c135823.graph_c2;c138081.graph_c0
GO:0008863	formate dehydrogenase (NAD+) activity	5	0.0011	MF	c128216.graph_c1;c131050.graph_c0;c133012.graph_c0;c133012.graph_c2;c137667.graph_c0
GO:0045330	aspartyl esterase activity	13	0.00127	MF	c117515.graph_c0;c121515.graph_c0;c122320.graph_c0;c122875.graph_c0;c122875.graph_c1;c122875.graph_c2;c124079.graph_c0;c129689.graph_c1;c130429.graph_c0;c130954.graph_c0;c132288.graph_c2;c136104.graph_c0;c138648.graph_c0
GO:0005524	ATP binding	331	0.00153	MF	c100878.graph_c0;c101170.graph_c1;c101614.graph_c0;c101686.graph_c0;c101686.graph_c1;c101785.graph_c0;c101900.graph_c0;c102231.graph_c0;c103177.graph_c0;c103406.graph_c0;c103748.graph_c0;c103923.graph_c0;c104110.graph_c0;c104420.graph_c0;c104432.graph_c0;c104507.graph_c0;c104561.graph_c0;c104967.graph_c2;c105191.graph_c1;c105898.graph_c0;c106838.graph_c0;c107263.graph_c0;c108728.graph_c0;c108728.…
GO:0016891	endoribonuclease activity, producing 5'-phosphomonoesters	4	0.0016	MF	c127273.graph_c0;c130266.graph_c0;c131747.graph_c1;c132028.graph_c1
GO:0016210	naringenin-chalcone synthase activity	3	0.00217	MF	c110937.graph_c0;c123632.graph_c0;c128646.graph_c0
GO:0008574	plus-end-directed microtubule motor activity	4	0.00241	MF	c116573.graph_c1;c127462.graph_c0;c132151.graph_c0;c134791.graph_c0
GO:0042285	xylosyltransferase activity	1	0.00248	MF	c121583.graph_c0
GO:0005516	calmodulin binding	6	0.00285	MF	c100878.graph_c0;c101686.graph_c1;c114996.graph_c0;c119983.graph_c0;c128965.graph_c0;c130443.graph_c0
GO:0016762	xyloglucan:xyloglucosyl transferase activity	8	0.00314	MF	c113465.graph_c0;c121170.graph_c0;c123621.graph_c0;c124923.graph_c0;c130222.graph_c0;c66679.graph_c0;c68177.graph_c0;c90963.graph_c1
GO:0005315	inorganic phosphate transmembrane transporter activity	12	0.0033	MF	c102232.graph_c0;c116428.graph_c0;c116428.graph_c1;c117657.graph_c0;c121716.graph_c2;c121716.graph_c3;c121716.graph_c4;c129614.graph_c0;c131606.graph_c0;c132487.graph_c1;c133914.graph_c0;c133914.graph_c1
GO:0035251	UDP-glucosyltransferase activity	45	0.00363	MF	c101674.graph_c0;c101674.graph_c1;c108625.graph_c0;c109640.graph_c0;c113684.graph_c0;c113684.graph_c2;c113776.graph_c1;c116412.graph_c0;c116412.graph_c1;c118196.graph_c0;c118638.graph_c0;c118984.graph_c0;c120337.graph_c0;c120772.graph_c0;c120772.graph_c1;c120876.graph_c0;c123492.graph_c0;c124161.graph_c0;c126096.graph_c0;c126377.graph_c0;c126546.graph_c0;c127398.graph_c0;c128318.graph_c0;c129422.…
GO:0004747	ribokinase activity	3	0.0037	MF	c101880.graph_c0;c122476.graph_c0;c137698.graph_c0
GO:0033926	glycopeptide alpha-N-acetylgalactosaminidase activity	5	0.00395	MF	c107980.graph_c1;c107980.graph_c2;c110834.graph_c0;c110834.graph_c1;c90712.graph_c1
GO:0004656	procollagen-proline 4-dioxygenase activity	1	0.00405	MF	c108903.graph_c0
GO:0003735	structural constituent of ribosome	75	0.00455	MF	c103313.graph_c0;c107461.graph_c0;c110568.graph_c0;c111166.graph_c0;c111293.graph_c0;c111302.graph_c0;c111401.graph_c0;c111635.graph_c0;c111958.graph_c0;c112150.graph_c0;c112641.graph_c0;c112641.graph_c1;c113497.graph_c0;c113874.graph_c0;c114267.graph_c0;c114786.graph_c0;c117327.graph_c0;c119276.graph_c0;c119658.graph_c0;c119776.graph_c0;c120089.graph_c0;c121008.graph_c0;c121190.graph_c0;c121325.…
GO:0004713	protein tyrosine kinase activity	8	0.00473	MF	c118272.graph_c0;c126446.graph_c0;c128324.graph_c1;c132314.graph_c0;c133917.graph_c2;c134686.graph_c0;c135799.graph_c0;c83678.graph_c0
GO:0045300	acyl-[acyl-carrier-protein] desaturase activity	5	0.00474	MF	c119683.graph_c0;c121987.graph_c0;c121987.graph_c1;c136864.graph_c3;c138667.graph_c0
GO:0003777	microtubule motor activity	24	0.00502	MF	c114448.graph_c0;c116573.graph_c1;c124681.graph_c4;c126471.graph_c0;c126928.graph_c0;c127462.graph_c0;c127533.graph_c0;c128910.graph_c1;c130357.graph_c1;c130571.graph_c0;c132151.graph_c0;c132278.graph_c0;c133059.graph_c0;c133258.graph_c0;c133898.graph_c4;c134416.graph_c0;c134791.graph_c0;c134909.graph_c0;c135971.graph_c0;c136529.graph_c0;c136811.graph_c0;c145562.graph_c0;c67759.graph_c0;c94672.gr…
GO:0050464	nitrate reductase (NADPH) activity	4	0.00582	MF	c110110.graph_c0;c124735.graph_c0;c124735.graph_c1;c133652.graph_c0
GO:0020037	heme binding	94	0.00593	MF	c102019.graph_c0;c103271.graph_c0;c103294.graph_c0;c104356.graph_c0;c104362.graph_c0;c105072.graph_c0;c107975.graph_c1;c109918.graph_c0;c110110.graph_c0;c110441.graph_c0;c113756.graph_c0;c114692.graph_c0;c114744.graph_c0;c115935.graph_c0;c116471.graph_c1;c116946.graph_c1;c117105.graph_c0;c117831.graph_c1;c118987.graph_c0;c119505.graph_c0;c120010.graph_c0;c120013.graph_c0;c120641.graph_c0;c120671.…
GO:0046983	protein dimerization activity	54	0.00666	MF	c100225.graph_c0;c101737.graph_c0;c102371.graph_c0;c104369.graph_c0;c107694.graph_c0;c111262.graph_c0;c112593.graph_c0;c113077.graph_c0;c115057.graph_c0;c115178.graph_c0;c115829.graph_c1;c120068.graph_c0;c121286.graph_c0;c122077.graph_c1;c122275.graph_c0;c122879.graph_c0;c123881.graph_c0;c124026.graph_c1;c124191.graph_c0;c124880.graph_c0;c125227.graph_c0;c125719.graph_c0;c126962.graph_c0;c127743.…
GO:0016987	sigma factor activity	3	0.00715	MF	c130575.graph_c0;c134216.graph_c2;c91116.graph_c0
GO:0004601	peroxidase activity	60	0.0073	MF	c111145.graph_c0;c112111.graph_c0;c112593.graph_c0;c112787.graph_c0;c113951.graph_c0;c114026.graph_c0;c114692.graph_c0;c116946.graph_c1;c118987.graph_c0;c119333.graph_c0;c120010.graph_c0;c120641.graph_c0;c121733.graph_c0;c121968.graph_c1;c123187.graph_c0;c123993.graph_c0;c124104.graph_c0;c124612.graph_c0;c124679.graph_c0;c125203.graph_c1;c125489.graph_c0;c125705.graph_c0;c125796.graph_c0;c127670.…
GO:0016709	oxidoreductase activity, acting on paired donors, with incorporation or reduction of molecular oxygen, NAD(P)H as one donor, and incorporation of one atom of oxygen	39	0.00743	MF	c102019.graph_c0;c104356.graph_c0;c105072.graph_c0;c106588.graph_c0;c109918.graph_c0;c109918.graph_c1;c110629.graph_c0;c114744.graph_c0;c116722.graph_c0;c117105.graph_c0;c120013.graph_c0;c120207.graph_c0;c120671.graph_c0;c121631.graph_c1;c123815.graph_c0;c126189.graph_c0;c126235.graph_c0;c128556.graph_c0;c128654.graph_c1;c130183.graph_c0;c130423.graph_c0;c130591.graph_c0;c131402.graph_c1;c131956.…
GO:0004888	transmembrane signaling receptor activity	6	0.00767	MF	c118272.graph_c0;c128324.graph_c1;c128525.graph_c0;c133786.graph_c0;c133917.graph_c2;c137047.graph_c0
GO:0052886	9,9'-dicis-carotene:quinone oxidoreductase activity	4	0.00778	MF	c100488.graph_c0;c121257.graph_c0;c129709.graph_c0;c137873.graph_c1
GO:0052887	7,9,9'-tricis-neurosporene:quinone oxidoreductase activity	4	0.00778	MF	c100488.graph_c0;c121257.graph_c0;c129709.graph_c0;c137873.graph_c1
GO:0019706	protein-cysteine S-palmitoyltransferase activity	3	0.00782	MF	c121934.graph_c0;c128474.graph_c0;c132754.graph_c2
GO:0090447	glycerol-3-phosphate 2-O-acyltransferase activity	6	0.00824	MF	c103086.graph_c1;c105091.graph_c0;c115901.graph_c0;c117906.graph_c0;c125007.graph_c0;c68000.graph_c0
GO:0008810	cellulase activity	9	0.00827	MF	c105933.graph_c0;c115370.graph_c0;c121430.graph_c0;c123432.graph_c0;c128172.graph_c0;c131371.graph_c0;c138115.graph_c0;c67656.graph_c0;c87951.graph_c0
GO:0030570	pectate lyase activity	8	0.00899	MF	c104257.graph_c0;c109240.graph_c0;c113909.graph_c0;c119632.graph_c0;c123241.graph_c0;c91769.graph_c0;c91769.graph_c1;c91769.graph_c2
GO:0016298	lipase activity	16	0.0098	MF	c102374.graph_c1;c109242.graph_c0;c116804.graph_c0;c119697.graph_c0;c122679.graph_c0;c123844.graph_c0;c127869.graph_c1;c130203.graph_c0;c134717.graph_c0;c135003.graph_c0;c139045.graph_c0;c140455.graph_c0;c67731.graph_c0;c87748.graph_c0;c87753.graph_c0;c88766.graph_c0
GO:0052716	hydroquinone:oxygen oxidoreductase activity	8	0.00997	MF	c116265.graph_c0;c123523.graph_c0;c131292.graph_c0;c131292.graph_c1;c133382.graph_c0;c136104.graph_c0;c68993.graph_c0;c97583.graph_c0
GO:0005384	manganese ion transmembrane transporter activity	4	0.01006	MF	c132487.graph_c1;c133914.graph_c0;c133914.graph_c1;c96558.graph_c0
GO:0008192	RNA guanylyltransferase activity	1	0.01045	MF	c124100.graph_c0
GO:0010857	calcium-dependent protein kinase activity	3	0.01222	MF	c100878.graph_c0;c101686.graph_c1;c130443.graph_c0
GO:0009931	calcium-dependent protein serine/threonine kinase activity	3	0.01222	MF	c100878.graph_c0;c101686.graph_c1;c130443.graph_c0
GO:0019199	transmembrane receptor protein kinase activity	4	0.01275	MF	c118272.graph_c0;c128324.graph_c1;c128525.graph_c0;c133917.graph_c2
GO:0005372	water transmembrane transporter activity	6	0.01299	MF	c101127.graph_c0;c101700.graph_c0;c125119.graph_c0;c132654.graph_c1;c138139.graph_c0;c83669.graph_c0
GO:0015166	polyol transmembrane transporter activity	5	0.01299	MF	c101127.graph_c0;c101700.graph_c0;c132654.graph_c1;c138139.graph_c0;c83669.graph_c0
GO:0015250	water channel activity	6	0.01299	MF	c101127.graph_c0;c101700.graph_c0;c125119.graph_c0;c132654.graph_c1;c138139.graph_c0;c83669.graph_c0
GO:0016724	oxidoreductase activity, oxidizing metal ions, oxygen as acceptor	3	0.01328	MF	c116114.graph_c0;c126288.graph_c0;c132136.graph_c2
GO:0004322	ferroxidase activity	3	0.01328	MF	c116114.graph_c0;c126288.graph_c0;c132136.graph_c2
GO:0004842	ubiquitin-protein transferase activity	22	0.0133	MF	c103923.graph_c0;c109456.graph_c1;c109456.graph_c2;c114497.graph_c0;c116801.graph_c0;c123391.graph_c0;c124699.graph_c1;c128449.graph_c0;c128935.graph_c0;c129388.graph_c0;c129742.graph_c0;c130139.graph_c0;c130207.graph_c0;c130376.graph_c1;c131652.graph_c0;c131831.graph_c0;c132408.graph_c2;c134874.graph_c0;c135992.graph_c1;c85451.graph_c0;c90881.graph_c0;c91433.graph_c0
GO:0016841	ammonia-lyase activity	2	0.01345	MF	c100354.graph_c0;c125063.graph_c4
GO:1901618	organic hydroxy compound transmembrane transporter activity	5	0.01382	MF	c101127.graph_c0;c101700.graph_c0;c132654.graph_c1;c138139.graph_c0;c83669.graph_c0
GO:0015665	alcohol transmembrane transporter activity	5	0.01382	MF	c101127.graph_c0;c101700.graph_c0;c132654.graph_c1;c138139.graph_c0;c83669.graph_c0
GO:0008375	acetylglucosaminyltransferase activity	5	0.01385	MF	c121583.graph_c0;c127835.graph_c0;c134411.graph_c1;c66934.graph_c0;c96816.graph_c1
GO:0003872	6-phosphofructokinase activity	3	0.01496	MF	c110452.graph_c2;c126851.graph_c1;c131478.graph_c1
GO:0004028	3-chloroallyl aldehyde dehydrogenase activity	2	0.01526	MF	c126949.graph_c0;c133123.graph_c0
GO:0016301	kinase activity	305	0.01588	MF	c100302.graph_c0;c100878.graph_c0;c101170.graph_c1;c101614.graph_c0;c101686.graph_c0;c101686.graph_c1;c101880.graph_c0;c101900.graph_c0;c103748.graph_c0;c104110.graph_c0;c104420.graph_c0;c104507.graph_c0;c104561.graph_c0;c106838.graph_c0;c107602.graph_c0;c108728.graph_c0;c108728.graph_c1;c109977.graph_c0;c110452.graph_c2;c111122.graph_c0;c111380.graph_c0;c111626.graph_c0;c111670.graph_c0;c111992.…
GO:0043546	molybdopterin cofactor binding	4	0.01668	MF	c110110.graph_c0;c124735.graph_c0;c124735.graph_c1;c133652.graph_c0
GO:0004623	phospholipase A2 activity	3	0.01716	MF	c122679.graph_c0;c123844.graph_c0;c88766.graph_c0
GO:0070568	guanylyltransferase activity	1	0.01727	MF	c124100.graph_c0
GO:0005528	FK506 binding	2	0.01743	MF	c126562.graph_c0;c131712.graph_c1
GO:0015095	magnesium ion transmembrane transporter activity	3	0.01825	MF	c126577.graph_c0;c127535.graph_c0;c136995.graph_c3
GO:0030554	adenyl nucleotide binding	331	0.01848	MF	c100878.graph_c0;c101170.graph_c1;c101614.graph_c0;c101686.graph_c0;c101686.graph_c1;c101785.graph_c0;c101900.graph_c0;c102231.graph_c0;c103177.graph_c0;c103406.graph_c0;c103748.graph_c0;c103923.graph_c0;c104110.graph_c0;c104420.graph_c0;c104432.graph_c0;c104507.graph_c0;c104561.graph_c0;c104967.graph_c2;c105191.graph_c1;c105898.graph_c0;c106838.graph_c0;c107263.graph_c0;c108728.graph_c0;c108728.…
GO:0035250	UDP-galactosyltransferase activity	1	0.01869	MF	c106062.graph_c1
GO:0045548	phenylalanine ammonia-lyase activity	2	0.01905	MF	c100354.graph_c0;c125063.graph_c4
GO:0004714	transmembrane receptor protein tyrosine kinase activity	3	0.01906	MF	c118272.graph_c0;c128324.graph_c1;c133917.graph_c2
GO:0004030	aldehyde dehydrogenase [NAD(P)+] activity	2	0.01973	MF	c126949.graph_c0;c81246.graph_c1
GO:0070330	aromatase activity	2	0.01994	MF	c123042.graph_c0;c68863.graph_c0
GO:0070008	serine-type exopeptidase activity	20	0.02002	MF	c103626.graph_c1;c115971.graph_c0;c115971.graph_c1;c116052.graph_c1;c116371.graph_c0;c117003.graph_c0;c124867.graph_c0;c125315.graph_c0;c126402.graph_c0;c127565.graph_c0;c130425.graph_c0;c131964.graph_c0;c132280.graph_c0;c134278.graph_c0;c134370.graph_c0;c134695.graph_c1;c136699.graph_c1;c137550.graph_c0;c68333.graph_c0;c76663.graph_c0
GO:0005506	iron ion binding	74	0.0202	MF	c101761.graph_c0;c102019.graph_c0;c102823.graph_c2;c103271.graph_c0;c103294.graph_c0;c104356.graph_c0;c105072.graph_c0;c106436.graph_c0;c107975.graph_c1;c108903.graph_c0;c109918.graph_c0;c110441.graph_c0;c113056.graph_c0;c113756.graph_c0;c114744.graph_c0;c115935.graph_c0;c116114.graph_c0;c116940.graph_c0;c116940.graph_c1;c116985.graph_c0;c117105.graph_c0;c117831.graph_c1;c119491.graph_c0;c120013.…
GO:0003843	1,3-beta-D-glucan synthase activity	4	0.02052	MF	c109640.graph_c0;c123492.graph_c0;c129422.graph_c0;c135015.graph_c0
GO:0004650	polygalacturonase activity	12	0.02078	MF	c116817.graph_c0;c118552.graph_c0;c120409.graph_c0;c120409.graph_c1;c120554.graph_c1;c120554.graph_c2;c120730.graph_c0;c130359.graph_c0;c132564.graph_c1;c69012.graph_c0;c83039.graph_c0;c95629.graph_c0
GO:0019203	carbohydrate phosphatase activity	7	0.02203	MF	c120383.graph_c0;c126198.graph_c0;c126220.graph_c1;c129791.graph_c0;c130652.graph_c0;c131662.graph_c0;c136222.graph_c0
GO:0003755	peptidyl-prolyl cis-trans isomerase activity	11	0.02279	MF	c122798.graph_c0;c123290.graph_c0;c126562.graph_c0;c127616.graph_c0;c129365.graph_c0;c130497.graph_c0;c131712.graph_c1;c131798.graph_c0;c135286.graph_c0;c135328.graph_c0;c138204.graph_c0
GO:0004124	cysteine synthase activity	3	0.02332	MF	c101457.graph_c0;c113505.graph_c0;c133817.graph_c1
GO:0004478	methionine adenosyltransferase activity	1	0.02412	MF	c103406.graph_c0
GO:0008977	prephenate dehydrogenase activity	1	0.02526	MF	c112803.graph_c0
GO:0004665	prephenate dehydrogenase (NADP+) activity	1	0.02526	MF	c112803.graph_c0
GO:0015168	glycerol transmembrane transporter activity	5	0.02579	MF	c101127.graph_c0;c101700.graph_c0;c132654.graph_c1;c138139.graph_c0;c83669.graph_c0
GO:0015254	glycerol channel activity	5	0.02579	MF	c101127.graph_c0;c101700.graph_c0;c132654.graph_c1;c138139.graph_c0;c83669.graph_c0
GO:0005527	macrolide binding	3	0.02587	MF	c126562.graph_c0;c130497.graph_c0;c131712.graph_c1
GO:0022843	voltage-gated cation channel activity	3	0.02608	MF	c133030.graph_c0;c134520.graph_c4;c135928.graph_c0
GO:0008144	drug binding	3	0.02627	MF	c126562.graph_c0;c130497.graph_c0;c131712.graph_c1
GO:0070566	adenylyltransferase activity	2	0.02758	MF	c134161.graph_c6;c93290.graph_c0
GO:0017137	Rab GTPase binding	1	0.02936	MF	c135302.graph_c4
GO:0004185	serine-type carboxypeptidase activity	18	0.02981	MF	c103626.graph_c1;c115971.graph_c0;c115971.graph_c1;c116052.graph_c1;c116371.graph_c0;c117003.graph_c0;c124867.graph_c0;c125315.graph_c0;c126402.graph_c0;c127565.graph_c0;c131964.graph_c0;c132280.graph_c0;c134278.graph_c0;c134370.graph_c0;c134695.graph_c1;c136699.graph_c1;c68333.graph_c0;c76663.graph_c0
GO:0004683	calmodulin-dependent protein kinase activity	3	0.03016	MF	c100878.graph_c0;c101686.graph_c1;c130443.graph_c0
GO:0003979	UDP-glucose 6-dehydrogenase activity	5	0.03089	MF	c115274.graph_c0;c115274.graph_c1;c115274.graph_c2;c122010.graph_c0;c127866.graph_c0
GO:0016278	lysine N-methyltransferase activity	2	0.03096	MF	c105516.graph_c0;c125214.graph_c0
GO:0016279	protein-lysine N-methyltransferase activity	2	0.03096	MF	c105516.graph_c0;c125214.graph_c0
GO:0047763	caffeate O-methyltransferase activity	3	0.03218	MF	c115829.graph_c1;c124026.graph_c1;c92168.graph_c0
GO:0005249	voltage-gated potassium channel activity	3	0.03232	MF	c133030.graph_c0;c134520.graph_c4;c135928.graph_c0
GO:0004721	phosphoprotein phosphatase activity	20	0.03354	MF	c117933.graph_c0;c118077.graph_c0;c120323.graph_c0;c120570.graph_c0;c124255.graph_c1;c124987.graph_c0;c125651.graph_c0;c125827.graph_c0;c126883.graph_c0;c126883.graph_c1;c128525.graph_c0;c129536.graph_c0;c129544.graph_c0;c131346.graph_c1;c131346.graph_c2;c131346.graph_c6;c133524.graph_c0;c134553.graph_c0;c96904.graph_c0;c99923.graph_c0
GO:0022834	ligand-gated channel activity	2	0.03509	MF	c135928.graph_c0;c137047.graph_c0
GO:0015276	ligand-gated ion channel activity	2	0.03509	MF	c135928.graph_c0;c137047.graph_c0
GO:0032559	adenyl ribonucleotide binding	331	0.03558	MF	c100878.graph_c0;c101170.graph_c1;c101614.graph_c0;c101686.graph_c0;c101686.graph_c1;c101785.graph_c0;c101900.graph_c0;c102231.graph_c0;c103177.graph_c0;c103406.graph_c0;c103748.graph_c0;c103923.graph_c0;c104110.graph_c0;c104420.graph_c0;c104432.graph_c0;c104507.graph_c0;c104561.graph_c0;c104967.graph_c2;c105191.graph_c1;c105898.graph_c0;c106838.graph_c0;c107263.graph_c0;c108728.graph_c0;c108728.…
GO:0030158	protein xylosyltransferase activity	1	0.0357	MF	c121583.graph_c0
GO:0035252	UDP-xylosyltransferase activity	1	0.0357	MF	c121583.graph_c0
GO:0009011	starch synthase activity	3	0.03855	MF	c101674.graph_c1;c120772.graph_c0;c134328.graph_c0
GO:0016859	cis-trans isomerase activity	11	0.03872	MF	c122798.graph_c0;c123290.graph_c0;c126562.graph_c0;c127616.graph_c0;c129365.graph_c0;c130497.graph_c0;c131712.graph_c1;c131798.graph_c0;c135286.graph_c0;c135328.graph_c0;c138204.graph_c0
GO:0015416	organic phosphonate transmembrane-transporting ATPase activity	4	0.03926	MF	c119968.graph_c0;c127376.graph_c0;c132421.graph_c0;c135563.graph_c1
GO:0015604	organic phosphonate transmembrane transporter activity	4	0.03926	MF	c119968.graph_c0;c127376.graph_c0;c132421.graph_c0;c135563.graph_c1
GO:0016211	ammonia ligase activity	5	0.03983	MF	c105898.graph_c0;c112254.graph_c0;c119429.graph_c0;c128241.graph_c0;c134949.graph_c0
GO:0004356	glutamate-ammonia ligase activity	5	0.03983	MF	c105898.graph_c0;c112254.graph_c0;c119429.graph_c0;c128241.graph_c0;c134949.graph_c0
GO:0016880	acid-ammonia (or amide) ligase activity	5	0.03983	MF	c105898.graph_c0;c112254.graph_c0;c119429.graph_c0;c128241.graph_c0;c134949.graph_c0
GO:0004004	ATP-dependent RNA helicase activity	5	0.04028	MF	c107263.graph_c0;c126373.graph_c0;c134724.graph_c0;c138708.graph_c0;c82669.graph_c0
GO:0046982	protein heterodimerization activity	19	0.04228	MF	c100225.graph_c0;c101737.graph_c0;c102371.graph_c0;c121286.graph_c0;c122077.graph_c1;c125227.graph_c0;c125719.graph_c0;c130647.graph_c0;c130706.graph_c0;c132550.graph_c0;c134404.graph_c0;c134518.graph_c0;c134518.graph_c2;c138138.graph_c0;c138189.graph_c0;c68569.graph_c0;c83114.graph_c0;c83770.graph_c0;c84908.graph_c0
GO:0031625	ubiquitin protein ligase binding	7	0.0433	MF	c103923.graph_c0;c123391.graph_c0;c129388.graph_c0;c130139.graph_c0;c130376.graph_c1;c134874.graph_c0;c135935.graph_c0
GO:0044389	small conjugating protein ligase binding	7	0.0433	MF	c103923.graph_c0;c123391.graph_c0;c129388.graph_c0;c130139.graph_c0;c130376.graph_c1;c134874.graph_c0;c135935.graph_c0
GO:0008443	phosphofructokinase activity	3	0.04387	MF	c110452.graph_c2;c126851.graph_c1;c131478.graph_c1
GO:0047372	acylglycerol lipase activity	2	0.04389	MF	c109242.graph_c0;c119697.graph_c0
GO:0046564	oxalate decarboxylase activity	5	0.04789	MF	c111951.graph_c0;c122471.graph_c0;c138950.graph_c0;c139433.graph_c0;c69094.graph_c0
GO:0015114	phosphate ion transmembrane transporter activity	2	0.04895	MF	c121716.graph_c2;c121716.graph_c4
GO:0004128	cytochrome-b5 reductase activity, acting on NAD(P)H	1	0.04946	MF	c112942.graph_c0
GO:0001046	core promoter sequence-specific DNA binding	4	0.04976	MF	c106118.graph_c0;c106430.graph_c0;c114702.graph_c0;c65266.graph_c0
GO:0001047	core promoter binding	4	0.04976	MF	c106118.graph_c0;c106430.graph_c0;c114702.graph_c0;c65266.graph_c0
GO:0009507	chloroplast	179	1e-30	CC	c100234.graph_c1;c101457.graph_c0;c101674.graph_c0;c101674.graph_c1;c101893.graph_c1;c102232.graph_c0;c103015.graph_c0;c103437.graph_c0;c105373.graph_c0;c107980.graph_c1;c111048.graph_c0;c111152.graph_c0;c111262.graph_c0;c111429.graph_c0;c111971.graph_c0;c112317.graph_c0;c112317.graph_c2;c112461.graph_c0;c112593.graph_c0;c113757.graph_c1;c114381.graph_c0;c114786.graph_c0;c115472.graph_c0;c115600.…
GO:0005886	plasma membrane	222	1.9e-29	CC	c100878.graph_c0;c101124.graph_c0;c101127.graph_c0;c101573.graph_c0;c101686.graph_c1;c101700.graph_c0;c102019.graph_c0;c102215.graph_c0;c102823.graph_c2;c103177.graph_c0;c104281.graph_c0;c104417.graph_c0;c104420.graph_c0;c104473.graph_c0;c105373.graph_c0;c105923.graph_c0;c107473.graph_c0;c108362.graph_c1;c108625.graph_c0;c109640.graph_c0;c109963.graph_c0;c111848.graph_c3;c112092.graph_c0;c112593.…
GO:0009570	chloroplast stroma	53	4.7e-23	CC	c101893.graph_c1;c103015.graph_c0;c111152.graph_c0;c111262.graph_c0;c111429.graph_c0;c111971.graph_c0;c112593.graph_c0;c114381.graph_c0;c114786.graph_c0;c115972.graph_c0;c117175.graph_c0;c118879.graph_c0;c120383.graph_c0;c121805.graph_c0;c122583.graph_c2;c122622.graph_c1;c122670.graph_c0;c122754.graph_c0;c122804.graph_c0;c123130.graph_c0;c124310.graph_c0;c124505.graph_c0;c124837.graph_c0;c126220.…
GO:0009506	plasmodesma	51	6.4e-23	CC	c101607.graph_c1;c102215.graph_c0;c102374.graph_c1;c102910.graph_c0;c103343.graph_c0;c105923.graph_c0;c112317.graph_c0;c112317.graph_c1;c112317.graph_c2;c112593.graph_c0;c116529.graph_c0;c116628.graph_c0;c116833.graph_c0;c118962.graph_c1;c119004.graph_c0;c120068.graph_c0;c122859.graph_c0;c124026.graph_c1;c124299.graph_c0;c125119.graph_c0;c125377.graph_c0;c126249.graph_c0;c127271.graph_c0;c128378.…
GO:0009941	chloroplast envelope	44	2.4e-20	CC	c105373.graph_c0;c111152.graph_c0;c111429.graph_c0;c111971.graph_c0;c114786.graph_c0;c115972.graph_c0;c118876.graph_c0;c118879.graph_c0;c120383.graph_c0;c121716.graph_c2;c121716.graph_c4;c121805.graph_c0;c122054.graph_c0;c122754.graph_c0;c122804.graph_c0;c124310.graph_c0;c124419.graph_c0;c124837.graph_c0;c125119.graph_c0;c126987.graph_c1;c128754.graph_c0;c130473.graph_c0;c130643.graph_c0;c130652.…
GO:0009535	chloroplast thylakoid membrane	41	1.5e-14	CC	c102232.graph_c0;c103437.graph_c0;c111152.graph_c0;c111429.graph_c0;c111971.graph_c0;c114381.graph_c0;c119064.graph_c0;c119268.graph_c0;c122622.graph_c1;c123555.graph_c0;c124310.graph_c0;c124837.graph_c0;c125801.graph_c0;c126963.graph_c0;c126987.graph_c1;c127315.graph_c0;c128754.graph_c0;c130643.graph_c0;c130767.graph_c0;c131334.graph_c0;c132561.graph_c0;c132561.graph_c2;c133456.graph_c0;c133476.…
GO:0005802	trans-Golgi network	20	1.4e-13	CC	c104070.graph_c0;c114302.graph_c4;c118021.graph_c0;c119853.graph_c0;c121924.graph_c0;c126492.graph_c1;c126611.graph_c0;c126752.graph_c0;c127006.graph_c0;c127616.graph_c0;c127796.graph_c0;c127982.graph_c1;c131166.graph_c0;c132279.graph_c0;c133338.graph_c3;c133423.graph_c0;c133457.graph_c0;c134575.graph_c0;c138792.graph_c0;c97114.graph_c0
GO:0009505	plant-type cell wall	37	1.8e-11	CC	c102309.graph_c0;c103343.graph_c0;c104070.graph_c0;c104369.graph_c0;c111723.graph_c0;c113548.graph_c1;c120010.graph_c0;c120400.graph_c0;c120641.graph_c0;c122423.graph_c0;c122471.graph_c0;c123220.graph_c0;c125119.graph_c0;c125377.graph_c0;c125705.graph_c0;c125796.graph_c0;c126249.graph_c0;c128378.graph_c1;c129013.graph_c1;c130275.graph_c0;c130306.graph_c0;c131116.graph_c0;c131824.graph_c0;c132296.…
GO:0005576	extracellular region	122	3.4e-10	CC	c100585.graph_c0;c100905.graph_c0;c101439.graph_c0;c101735.graph_c0;c102309.graph_c0;c103343.graph_c0;c111135.graph_c0;c111854.graph_c0;c111951.graph_c0;c112317.graph_c0;c112317.graph_c2;c112593.graph_c0;c113371.graph_c0;c113465.graph_c0;c113973.graph_c0;c114419.graph_c0;c114692.graph_c0;c114877.graph_c0;c115591.graph_c0;c115960.graph_c0;c116265.graph_c0;c116529.graph_c0;c116817.graph_c0;c116946.…
GO:0046658	anchored component of plasma membrane	31	6.4e-09	CC	c101124.graph_c0;c102215.graph_c0;c105923.graph_c0;c107473.graph_c0;c108362.graph_c1;c112092.graph_c0;c113548.graph_c1;c116849.graph_c0;c117759.graph_c0;c119219.graph_c0;c123991.graph_c0;c124168.graph_c1;c124297.graph_c0;c125377.graph_c0;c125752.graph_c0;c125926.graph_c0;c126249.graph_c0;c127682.graph_c0;c129488.graph_c0;c131724.graph_c0;c132503.graph_c0;c133338.graph_c0;c138127.graph_c0;c65374.g…
GO:0048046	apoplast	34	5.8e-08	CC	c112317.graph_c0;c112317.graph_c2;c112593.graph_c0;c113465.graph_c0;c114877.graph_c0;c116265.graph_c0;c117175.graph_c0;c120383.graph_c0;c120400.graph_c0;c121170.graph_c0;c122471.graph_c0;c123523.graph_c0;c123621.graph_c0;c124923.graph_c0;c130162.graph_c0;c130222.graph_c0;c130306.graph_c0;c130652.graph_c0;c131116.graph_c0;c131292.graph_c0;c131292.graph_c1;c132205.graph_c0;c134924.graph_c0;c135597.…
GO:0005618	cell wall	110	6.8e-07	CC	c100585.graph_c0;c102309.graph_c0;c103343.graph_c0;c104070.graph_c0;c104369.graph_c0;c111723.graph_c0;c111951.graph_c0;c112317.graph_c0;c112317.graph_c2;c112593.graph_c0;c113270.graph_c0;c113465.graph_c0;c113548.graph_c1;c115831.graph_c0;c115960.graph_c0;c116147.graph_c0;c117146.graph_c0;c117515.graph_c0;c120010.graph_c0;c120400.graph_c0;c120400.graph_c1;c120550.graph_c0;c120641.graph_c0;c121170.…
GO:0009534	chloroplast thylakoid	50	1.3e-06	CC	c102232.graph_c0;c103437.graph_c0;c111152.graph_c0;c111429.graph_c0;c111971.graph_c0;c114381.graph_c0;c117066.graph_c0;c119064.graph_c0;c119268.graph_c0;c119282.graph_c0;c122622.graph_c1;c123555.graph_c0;c124310.graph_c0;c124837.graph_c0;c125801.graph_c0;c126963.graph_c0;c126987.graph_c1;c127315.graph_c0;c128046.graph_c0;c128754.graph_c0;c130473.graph_c0;c130643.graph_c0;c130767.graph_c0;c131184.…
GO:0031977	thylakoid lumen	3	2.6e-06	CC	c119282.graph_c0;c130643.graph_c0;c131342.graph_c0
GO:0009523	photosystem II	13	6.7e-06	CC	c111048.graph_c0;c111152.graph_c0;c111971.graph_c0;c127315.graph_c0;c128754.graph_c0;c132561.graph_c0;c132561.graph_c2;c134487.graph_c0;c135031.graph_c0;c135031.graph_c1;c136893.graph_c0;c81752.graph_c2;c86076.graph_c0
GO:0009522	photosystem I	19	7.3e-06	CC	c111152.graph_c0;c111429.graph_c0;c111971.graph_c0;c118248.graph_c0;c119064.graph_c0;c124837.graph_c0;c128754.graph_c0;c130643.graph_c0;c130767.graph_c0;c131488.graph_c0;c132561.graph_c0;c132561.graph_c2;c133476.graph_c0;c134486.graph_c0;c135031.graph_c0;c135031.graph_c1;c68067.graph_c0;c81752.graph_c0;c81752.graph_c2
GO:0005871	kinesin complex	19	1.1e-05	CC	c116573.graph_c1;c124681.graph_c4;c126471.graph_c0;c126928.graph_c0;c127462.graph_c0;c130357.graph_c1;c130571.graph_c0;c132151.graph_c0;c133059.graph_c0;c133258.graph_c0;c133898.graph_c4;c134416.graph_c0;c134791.graph_c0;c134909.graph_c0;c135971.graph_c0;c136529.graph_c0;c136811.graph_c0;c67759.graph_c0;c94672.graph_c0
GO:0009536	plastid	206	5.3e-05	CC	c100234.graph_c1;c101423.graph_c1;c101457.graph_c0;c101674.graph_c0;c101674.graph_c1;c101893.graph_c1;c102232.graph_c0;c103015.graph_c0;c103437.graph_c0;c105373.graph_c0;c106990.graph_c0;c107980.graph_c1;c110668.graph_c0;c110998.graph_c0;c111048.graph_c0;c111152.graph_c0;c111166.graph_c0;c111262.graph_c0;c111401.graph_c0;c111429.graph_c0;c111566.graph_c0;c111971.graph_c0;c112317.graph_c0;c112317.…
GO:0005764	lysosome	4	0.00012	CC	c101439.graph_c0;c113371.graph_c0;c134087.graph_c0;c94339.graph_c0
GO:0042651	thylakoid membrane	46	0.00013	CC	c102232.graph_c0;c103437.graph_c0;c111048.graph_c0;c111152.graph_c0;c111429.graph_c0;c111971.graph_c0;c114381.graph_c0;c119064.graph_c0;c119268.graph_c0;c122622.graph_c1;c123555.graph_c0;c124000.graph_c0;c124310.graph_c0;c124837.graph_c0;c125801.graph_c0;c126963.graph_c0;c126987.graph_c1;c127315.graph_c0;c128754.graph_c0;c130643.graph_c0;c130767.graph_c0;c131334.graph_c0;c132561.graph_c0;c132561.…
GO:0010287	plastoglobule	17	0.00014	CC	c111152.graph_c0;c111429.graph_c0;c111971.graph_c0;c122622.graph_c1;c124310.graph_c0;c124837.graph_c0;c130643.graph_c0;c131334.graph_c0;c132561.graph_c0;c132561.graph_c2;c133476.graph_c0;c134486.graph_c0;c135031.graph_c0;c135031.graph_c1;c135628.graph_c0;c136656.graph_c0;c81752.graph_c2
GO:0005768	endosome	29	0.00015	CC	c103208.graph_c0;c104070.graph_c0;c112469.graph_c1;c114302.graph_c4;c116183.graph_c0;c116986.graph_c1;c118021.graph_c0;c119853.graph_c0;c121924.graph_c0;c122054.graph_c0;c126492.graph_c1;c126611.graph_c0;c126752.graph_c0;c127616.graph_c0;c127796.graph_c0;c127982.graph_c1;c130644.graph_c0;c130953.graph_c0;c131166.graph_c0;c132279.graph_c0;c133338.graph_c3;c133423.graph_c0;c133457.graph_c0;c134575.…
GO:0005874	microtubule	28	0.00017	CC	c100476.graph_c0;c112778.graph_c0;c117010.graph_c0;c120267.graph_c1;c120604.graph_c0;c124681.graph_c4;c124909.graph_c3;c128718.graph_c0;c129590.graph_c0;c130135.graph_c0;c130571.graph_c0;c133059.graph_c0;c133242.graph_c0;c133258.graph_c0;c134612.graph_c0;c134909.graph_c0;c136563.graph_c0;c136811.graph_c0;c136842.graph_c1;c137033.graph_c2;c141347.graph_c0;c68838.graph_c0;c68988.graph_c0;c83759.gra…
GO:0009579	thylakoid	69	0.00083	CC	c102232.graph_c0;c103437.graph_c0;c111048.graph_c0;c111152.graph_c0;c111429.graph_c0;c111971.graph_c0;c112593.graph_c0;c113988.graph_c0;c114381.graph_c0;c117066.graph_c0;c118248.graph_c0;c119064.graph_c0;c119268.graph_c0;c119282.graph_c0;c120289.graph_c0;c120383.graph_c0;c120509.graph_c0;c122622.graph_c1;c122798.graph_c0;c123555.graph_c0;c124000.graph_c0;c124310.graph_c0;c124837.graph_c0;c125801.…
GO:0009501	amyloplast	6	0.00208	CC	c101674.graph_c0;c101674.graph_c1;c120772.graph_c0;c120772.graph_c1;c134328.graph_c0;c135484.graph_c1
GO:0009706	chloroplast inner membrane	1	0.00286	CC	c118876.graph_c0
GO:0022627	cytosolic small ribosomal subunit	16	0.00324	CC	c112150.graph_c0;c113874.graph_c0;c114267.graph_c0;c122104.graph_c0;c123928.graph_c0;c124690.graph_c1;c125130.graph_c0;c125474.graph_c0;c125679.graph_c0;c127602.graph_c0;c127742.graph_c0;c127950.graph_c0;c129748.graph_c0;c131544.graph_c0;c133908.graph_c0;c88141.graph_c0
GO:0044434	chloroplast part	103	0.00336	CC	c101674.graph_c1;c101893.graph_c1;c102232.graph_c0;c103015.graph_c0;c103437.graph_c0;c105373.graph_c0;c111152.graph_c0;c111262.graph_c0;c111429.graph_c0;c111971.graph_c0;c112593.graph_c0;c114381.graph_c0;c114786.graph_c0;c115972.graph_c0;c117066.graph_c0;c117175.graph_c0;c118876.graph_c0;c118879.graph_c0;c119064.graph_c0;c119268.graph_c0;c119282.graph_c0;c120367.graph_c0;c120383.graph_c0;c121716.…
GO:0000786	nucleosome	19	0.00534	CC	c100225.graph_c0;c101737.graph_c0;c102170.graph_c0;c102371.graph_c0;c121286.graph_c0;c122077.graph_c1;c125227.graph_c0;c125719.graph_c0;c128265.graph_c2;c130647.graph_c0;c132550.graph_c0;c134518.graph_c0;c134518.graph_c2;c138138.graph_c0;c138189.graph_c0;c68569.graph_c0;c83114.graph_c0;c83770.graph_c0;c84908.graph_c0
GO:0042555	MCM complex	5	0.00596	CC	c110712.graph_c0;c118020.graph_c0;c131995.graph_c0;c135963.graph_c0;c67706.graph_c0
GO:0009705	plant-type vacuole membrane	11	0.00636	CC	c101127.graph_c0;c101700.graph_c0;c122054.graph_c0;c125038.graph_c0;c125119.graph_c0;c128646.graph_c0;c132887.graph_c2;c136174.graph_c2;c136393.graph_c2;c138381.graph_c0;c138794.graph_c0
GO:0000795	synaptonemal complex	6	0.00947	CC	c118253.graph_c1;c118253.graph_c2;c132108.graph_c0;c138375.graph_c0;c68110.graph_c0;c84176.graph_c0
GO:0030894	replisome	5	0.01554	CC	c104001.graph_c0;c108436.graph_c0;c130706.graph_c0;c134168.graph_c0;c81087.graph_c0
GO:0005615	extracellular space	7	0.016	CC	c101439.graph_c0;c111135.graph_c0;c113371.graph_c0;c124123.graph_c1;c134087.graph_c0;c68070.graph_c0;c94339.graph_c0
GO:0005960	glycine cleavage complex	4	0.01642	CC	c115897.graph_c0;c125325.graph_c0;c133526.graph_c0;c67882.graph_c1
GO:0009504	cell plate	4	0.0194	CC	c125197.graph_c0;c130644.graph_c0;c130953.graph_c0;c94866.graph_c0
GO:0009532	plastid stroma	53	0.02051	CC	c101893.graph_c1;c103015.graph_c0;c111152.graph_c0;c111262.graph_c0;c111429.graph_c0;c111971.graph_c0;c112593.graph_c0;c114381.graph_c0;c114786.graph_c0;c115972.graph_c0;c117175.graph_c0;c118879.graph_c0;c120383.graph_c0;c121805.graph_c0;c122583.graph_c2;c122622.graph_c1;c122670.graph_c0;c122754.graph_c0;c122804.graph_c0;c123130.graph_c0;c124310.graph_c0;c124505.graph_c0;c124837.graph_c0;c126220.…
GO:0044421	extracellular region part	7	0.0212	CC	c101439.graph_c0;c111135.graph_c0;c113371.graph_c0;c124123.graph_c1;c134087.graph_c0;c68070.graph_c0;c94339.graph_c0
GO:0000347	THO complex	4	0.02149	CC	c110712.graph_c0;c118020.graph_c0;c131995.graph_c0;c67706.graph_c0
GO:0017119	Golgi transport complex	2	0.02446	CC	c114057.graph_c0;c126714.graph_c0
GO:0098552	side of membrane	5	0.02526	CC	c124504.graph_c1;c132421.graph_c0;c132628.graph_c0;c132891.graph_c0;c132891.graph_c1
GO:0000148	1,3-beta-D-glucan synthase complex	4	0.03032	CC	c109640.graph_c0;c123492.graph_c0;c129422.graph_c0;c135015.graph_c0
GO:0009897	external side of plasma membrane	4	0.03425	CC	c124504.graph_c1;c132421.graph_c0;c132891.graph_c0;c132891.graph_c1
GO:0009503	thylakoid light-harvesting complex	5	0.03489	CC	c103437.graph_c0;c128754.graph_c0;c134486.graph_c0;c135031.graph_c0;c135031.graph_c1
GO:0044815	DNA packaging complex	21	0.03702	CC	c100225.graph_c0;c101737.graph_c0;c102170.graph_c0;c102371.graph_c0;c121286.graph_c0;c122077.graph_c1;c125227.graph_c0;c125719.graph_c0;c128265.graph_c2;c130647.graph_c0;c132550.graph_c0;c133473.graph_c0;c134518.graph_c0;c134518.graph_c2;c135559.graph_c0;c138138.graph_c0;c138189.graph_c0;c68569.graph_c0;c83114.graph_c0;c83770.graph_c0;c84908.graph_c0
GO:0009654	photosystem II oxygen evolving complex	4	0.04224	CC	c127315.graph_c0;c134487.graph_c0;c136893.graph_c0;c86076.graph_c0
GO:0031463	Cul3-RING ubiquitin ligase complex	1	0.04431	CC	c85451.graph_c0
GO:0019005	SCF ubiquitin ligase complex	4	0.04721	CC	c116801.graph_c0;c129742.graph_c0;c86948.graph_c0;c90881.graph_c0
GO:0009538	photosystem I reaction center	5	0.04969	CC	c119064.graph_c0;c130643.graph_c0;c130767.graph_c0;c133476.graph_c0;c68067.graph_c0
GO:0006468	protein phosphorylation	169	4.1e-25	BP	c100878.graph_c0;c101170.graph_c1;c101614.graph_c0;c101686.graph_c0;c101686.graph_c1;c101900.graph_c0;c103748.graph_c0;c104110.graph_c0;c104420.graph_c0;c104507.graph_c0;c104561.graph_c0;c106838.graph_c0;c108728.graph_c0;c108728.graph_c1;c109977.graph_c0;c111122.graph_c0;c111626.graph_c0;c111992.graph_c2;c112365.graph_c0;c112749.graph_c0;c112778.graph_c0;c113329.graph_c0;c113548.graph_c1;c114271.…
GO:0009793	embryo development ending in seed dormancy	14	1.1e-11	BP	c110712.graph_c0;c113220.graph_c0;c116183.graph_c0;c118584.graph_c0;c123108.graph_c0;c124909.graph_c3;c126249.graph_c0;c131514.graph_c2;c131824.graph_c0;c135850.graph_c1;c137619.graph_c0;c67862.graph_c1;c68379.graph_c0;c94866.graph_c0
GO:0009664	plant-type cell wall organization	28	4e-10	BP	c100585.graph_c0;c102309.graph_c0;c115960.graph_c0;c117146.graph_c0;c119853.graph_c0;c120010.graph_c0;c120550.graph_c0;c120641.graph_c0;c123653.graph_c0;c125705.graph_c0;c125796.graph_c0;c126037.graph_c0;c126855.graph_c0;c128318.graph_c0;c131446.graph_c1;c131446.graph_c3;c134575.graph_c0;c135186.graph_c0;c136206.graph_c0;c136608.graph_c1;c136772.graph_c0;c136772.graph_c2;c136772.graph_c3;c138896.…
GO:0009813	flavonoid biosynthetic process	22	2.9e-09	BP	c100968.graph_c0;c110937.graph_c0;c112245.graph_c0;c113684.graph_c0;c113684.graph_c2;c113776.graph_c1;c118638.graph_c0;c120876.graph_c0;c124026.graph_c1;c126070.graph_c0;c126377.graph_c0;c126546.graph_c0;c128646.graph_c0;c133288.graph_c2;c133582.graph_c1;c136944.graph_c0;c137011.graph_c0;c138081.graph_c0;c68678.graph_c0;c78629.graph_c0;c84056.graph_c0;c94335.graph_c0
GO:0015979	photosynthesis	47	1.3e-08	BP	c103437.graph_c0;c106990.graph_c0;c111152.graph_c0;c111429.graph_c0;c111971.graph_c0;c117513.graph_c0;c118248.graph_c0;c119064.graph_c0;c120383.graph_c0;c121767.graph_c0;c123555.graph_c0;c123815.graph_c0;c124000.graph_c0;c124837.graph_c0;c126220.graph_c1;c126987.graph_c1;c127315.graph_c0;c128754.graph_c0;c129146.graph_c0;c130643.graph_c0;c130652.graph_c0;c130767.graph_c0;c131184.graph_c0;c131334.…
GO:0009734	auxin-activated signaling pathway	23	2.1e-08	BP	c100214.graph_c0;c115953.graph_c0;c117956.graph_c1;c119431.graph_c0;c120293.graph_c0;c120718.graph_c0;c123962.graph_c0;c123962.graph_c1;c124780.graph_c0;c126590.graph_c1;c128609.graph_c0;c130661.graph_c0;c131824.graph_c0;c132172.graph_c1;c132864.graph_c0;c133696.graph_c0;c135120.graph_c2;c136622.graph_c0;c136641.graph_c3;c138381.graph_c0;c65834.graph_c0;c67862.graph_c1;c81252.graph_c0
GO:0030244	cellulose biosynthetic process	16	1.3e-07	BP	c108625.graph_c0;c116412.graph_c0;c116412.graph_c1;c118196.graph_c0;c124161.graph_c0;c126096.graph_c0;c128318.graph_c0;c131595.graph_c0;c133457.graph_c0;c134054.graph_c1;c137016.graph_c0;c67743.graph_c0;c68914.graph_c0;c83063.graph_c0;c88105.graph_c0;c91199.graph_c1
GO:0042742	defense response to bacterium	8	8.2e-07	BP	c108625.graph_c0;c118196.graph_c0;c118557.graph_c0;c119100.graph_c0;c128525.graph_c0;c132205.graph_c0;c136093.graph_c2;c88560.graph_c0
GO:0052696	flavonoid glucuronidation	14	1.6e-06	BP	c113684.graph_c0;c113684.graph_c2;c113776.graph_c1;c118638.graph_c0;c120876.graph_c0;c126377.graph_c0;c126546.graph_c0;c133582.graph_c1;c136944.graph_c0;c137011.graph_c0;c68678.graph_c0;c78629.graph_c0;c84056.graph_c0;c94335.graph_c0
GO:0032259	methylation	50	1.6e-06	BP	c102019.graph_c0;c103773.graph_c0;c104070.graph_c0;c105516.graph_c0;c110976.graph_c0;c114302.graph_c0;c114302.graph_c4;c115829.graph_c1;c116594.graph_c0;c116908.graph_c0;c118021.graph_c0;c119853.graph_c0;c120424.graph_c0;c123130.graph_c0;c123251.graph_c0;c124026.graph_c1;c124311.graph_c0;c124781.graph_c0;c124861.graph_c1;c125214.graph_c0;c125240.graph_c0;c126101.graph_c0;c126752.graph_c0;c130822.…
GO:0009699	phenylpropanoid biosynthetic process	23	6.2e-06	BP	c100354.graph_c0;c100905.graph_c0;c107374.graph_c0;c110642.graph_c0;c113197.graph_c0;c115829.graph_c1;c119914.graph_c0;c123042.graph_c0;c123523.graph_c0;c124026.graph_c1;c124632.graph_c0;c125063.graph_c4;c127376.graph_c0;c128556.graph_c0;c131292.graph_c0;c131292.graph_c1;c131679.graph_c0;c136104.graph_c0;c138982.graph_c0;c67678.graph_c0;c68993.graph_c0;c92168.graph_c0;c95713.graph_c0
GO:0009414	response to water deprivation	9	6.2e-06	BP	c122054.graph_c0;c128754.graph_c0;c133151.graph_c0;c133786.graph_c0;c134054.graph_c1;c134404.graph_c0;c134770.graph_c1;c136174.graph_c2;c87063.graph_c0
GO:0048364	root development	20	9.4e-06	BP	c101457.graph_c0;c106430.graph_c0;c110712.graph_c0;c116628.graph_c0;c120548.graph_c0;c121723.graph_c0;c128410.graph_c0;c128525.graph_c0;c131514.graph_c2;c131824.graph_c0;c132980.graph_c0;c136746.graph_c3;c138950.graph_c0;c67862.graph_c1;c67944.graph_c0;c69056.graph_c0;c70211.graph_c0;c80885.graph_c0;c92524.graph_c0;c99247.graph_c0
GO:0015977	carbon fixation	8	1.1e-05	BP	c106990.graph_c0;c120383.graph_c0;c126220.graph_c1;c130652.graph_c0;c132242.graph_c0;c134924.graph_c0;c136768.graph_c0;c137612.graph_c0
GO:0010051	xylem and phloem pattern formation	10	1.3e-05	BP	c106921.graph_c0;c112776.graph_c0;c121723.graph_c0;c128587.graph_c0;c131824.graph_c0;c132028.graph_c1;c132172.graph_c1;c132421.graph_c0;c92524.graph_c0;c94866.graph_c0
GO:0009965	leaf morphogenesis	5	1.4e-05	BP	c126962.graph_c0;c131824.graph_c0;c132172.graph_c1;c134634.graph_c3;c88560.graph_c0
GO:0009926	auxin polar transport	10	1.4e-05	BP	c120312.graph_c0;c120312.graph_c2;c122054.graph_c0;c128609.graph_c0;c128646.graph_c0;c131824.graph_c0;c136174.graph_c2;c67808.graph_c0;c67862.graph_c1;c70211.graph_c0
GO:0009416	response to light stimulus	31	1.7e-05	BP	c100968.graph_c0;c111152.graph_c0;c111429.graph_c0;c111971.graph_c0;c117932.graph_c1;c118777.graph_c0;c122077.graph_c0;c122081.graph_c0;c122275.graph_c0;c124837.graph_c0;c126987.graph_c1;c128609.graph_c0;c128646.graph_c0;c128754.graph_c0;c129146.graph_c0;c130104.graph_c0;c131334.graph_c0;c132561.graph_c0;c132561.graph_c2;c133573.graph_c0;c134486.graph_c0;c134948.graph_c0;c135031.graph_c0;c135031.…
GO:0016998	cell wall macromolecule catabolic process	13	1.9e-05	BP	c100948.graph_c0;c104656.graph_c0;c106034.graph_c0;c106034.graph_c2;c111144.graph_c0;c120779.graph_c0;c124923.graph_c0;c125425.graph_c1;c127067.graph_c0;c128395.graph_c0;c136667.graph_c1;c75446.graph_c0;c77836.graph_c0
GO:0048437	floral organ development	10	2.3e-05	BP	c105018.graph_c0;c112098.graph_c0;c122879.graph_c0;c125214.graph_c0;c128218.graph_c0;c128609.graph_c0;c130921.graph_c0;c133004.graph_c0;c138712.graph_c0;c80611.graph_c0
GO:0048645	organ formation	10	2.4e-05	BP	c114057.graph_c0;c116628.graph_c0;c128218.graph_c0;c131514.graph_c2;c131824.graph_c0;c134634.graph_c3;c138712.graph_c0;c70211.graph_c0;c80611.graph_c0;c99247.graph_c0
GO:0009791	post-embryonic development	69	2.6e-05	BP	c101622.graph_c0;c105018.graph_c0;c105569.graph_c0;c106430.graph_c0;c109069.graph_c0;c110712.graph_c0;c112098.graph_c0;c113220.graph_c0;c113650.graph_c0;c115901.graph_c0;c116183.graph_c0;c116465.graph_c0;c116628.graph_c0;c116821.graph_c0;c117906.graph_c0;c117956.graph_c1;c118523.graph_c0;c118584.graph_c0;c118777.graph_c0;c120548.graph_c0;c120718.graph_c0;c121422.graph_c0;c121805.graph_c0;c122077.…
GO:0010143	cutin biosynthetic process	10	3.2e-05	BP	c103086.graph_c1;c105091.graph_c0;c115901.graph_c0;c116628.graph_c0;c117906.graph_c0;c125007.graph_c0;c126647.graph_c0;c130183.graph_c0;c136689.graph_c2;c68000.graph_c0
GO:0009768	photosynthesis, light harvesting in photosystem I	14	3.9e-05	BP	c111152.graph_c0;c111429.graph_c0;c111971.graph_c0;c124837.graph_c0;c128754.graph_c0;c129146.graph_c0;c131334.graph_c0;c132561.graph_c0;c132561.graph_c2;c134486.graph_c0;c135031.graph_c0;c135031.graph_c1;c135628.graph_c0;c81752.graph_c2
GO:0009735	response to cytokinin	7	5.9e-05	BP	c113966.graph_c0;c122471.graph_c0;c127315.graph_c0;c128525.graph_c0;c132028.graph_c1;c132998.graph_c0;c135597.graph_c0
GO:0050832	defense response to fungus	11	6.5e-05	BP	c108625.graph_c0;c113973.graph_c0;c116628.graph_c0;c118196.graph_c0;c118557.graph_c0;c119100.graph_c0;c131161.graph_c0;c135597.graph_c0;c138080.graph_c0;c86432.graph_c0;c88560.graph_c0
GO:0009737	response to abscisic acid	16	6.9e-05	BP	c100878.graph_c0;c101622.graph_c0;c101686.graph_c1;c109069.graph_c0;c111577.graph_c0;c112593.graph_c0;c116370.graph_c0;c122115.graph_c0;c122306.graph_c0;c125237.graph_c0;c127545.graph_c1;c130443.graph_c0;c131107.graph_c1;c131161.graph_c0;c132028.graph_c1;c132421.graph_c0
GO:0045490	pectin catabolic process	20	7.7e-05	BP	c104257.graph_c0;c109240.graph_c0;c113909.graph_c0;c117515.graph_c0;c119632.graph_c0;c121515.graph_c0;c122320.graph_c0;c122875.graph_c0;c122875.graph_c1;c122875.graph_c2;c123241.graph_c0;c124079.graph_c0;c129689.graph_c1;c130429.graph_c0;c130954.graph_c0;c132288.graph_c2;c138648.graph_c0;c91769.graph_c0;c91769.graph_c1;c91769.graph_c2
GO:0006952	defense response	31	8.1e-05	BP	c102215.graph_c0;c105923.graph_c0;c108625.graph_c0;c111522.graph_c0;c113973.graph_c0;c114996.graph_c0;c116628.graph_c0;c118196.graph_c0;c118557.graph_c0;c119100.graph_c0;c124853.graph_c0;c126936.graph_c0;c128525.graph_c0;c131161.graph_c0;c131660.graph_c0;c131867.graph_c0;c132205.graph_c0;c133399.graph_c0;c135597.graph_c0;c135928.graph_c0;c135935.graph_c0;c136093.graph_c2;c138080.graph_c0;c138663.…
GO:0043412	macromolecule modification	263	8.8e-05	BP	c100878.graph_c0;c101170.graph_c1;c101614.graph_c0;c101686.graph_c0;c101686.graph_c1;c101893.graph_c0;c101893.graph_c1;c101900.graph_c0;c103748.graph_c0;c103923.graph_c0;c104110.graph_c0;c104420.graph_c0;c104507.graph_c0;c104561.graph_c0;c105516.graph_c0;c106062.graph_c1;c106838.graph_c0;c108728.graph_c0;c108728.graph_c1;c108903.graph_c0;c109456.graph_c1;c109456.graph_c2;c109977.graph_c0;c111122.…
GO:0006464	cellular protein modification process	247	8.9e-05	BP	c100878.graph_c0;c101170.graph_c1;c101614.graph_c0;c101686.graph_c0;c101686.graph_c1;c101893.graph_c0;c101893.graph_c1;c101900.graph_c0;c103748.graph_c0;c103923.graph_c0;c104110.graph_c0;c104420.graph_c0;c104507.graph_c0;c104561.graph_c0;c105516.graph_c0;c106062.graph_c1;c106838.graph_c0;c108728.graph_c0;c108728.graph_c1;c108903.graph_c0;c109456.graph_c1;c109456.graph_c2;c109977.graph_c0;c111122.…
GO:0010090	trichome morphogenesis	7	0.00011	BP	c105018.graph_c0;c120951.graph_c0;c122685.graph_c0;c131874.graph_c1;c136689.graph_c2;c139058.graph_c0;c94866.graph_c0
GO:0018298	protein-chromophore linkage	11	0.00012	BP	c111152.graph_c0;c111429.graph_c0;c111971.graph_c0;c124837.graph_c0;c132561.graph_c0;c132561.graph_c2;c134486.graph_c0;c135031.graph_c0;c135031.graph_c1;c81752.graph_c0;c81752.graph_c2
GO:0009733	response to auxin	32	0.00012	BP	c100214.graph_c0;c115953.graph_c0;c117956.graph_c1;c119431.graph_c0;c120293.graph_c0;c120718.graph_c0;c123962.graph_c0;c123962.graph_c1;c124780.graph_c0;c126590.graph_c1;c128609.graph_c0;c129552.graph_c0;c130661.graph_c0;c131824.graph_c0;c132028.graph_c1;c132172.graph_c1;c132864.graph_c0;c133696.graph_c0;c135120.graph_c2;c136622.graph_c0;c136641.graph_c3;c138381.graph_c0;c138637.graph_c0;c65834.g…
GO:0009832	plant-type cell wall biogenesis	13	0.00014	BP	c106921.graph_c0;c108625.graph_c0;c109967.graph_c0;c118196.graph_c0;c123653.graph_c0;c126037.graph_c0;c126096.graph_c0;c128318.graph_c0;c133457.graph_c0;c134575.graph_c0;c138381.graph_c0;c67683.graph_c0;c94866.graph_c0
GO:0042127	regulation of cell proliferation	4	0.00014	BP	c110712.graph_c0;c124504.graph_c1;c132891.graph_c0;c132891.graph_c1
GO:0048573	photoperiodism, flowering	4	0.00014	BP	c118777.graph_c0;c135654.graph_c0;c91712.graph_c0;c93290.graph_c0
GO:0009909	regulation of flower development	6	0.00018	BP	c118777.graph_c0;c121422.graph_c0;c121805.graph_c0;c138712.graph_c0;c80611.graph_c0;c91712.graph_c0
GO:0009787	regulation of abscisic acid-activated signaling pathway	3	0.00019	BP	c111577.graph_c0;c131107.graph_c1;c131161.graph_c0
GO:0042183	formate catabolic process	5	0.00023	BP	c128216.graph_c1;c131050.graph_c0;c133012.graph_c0;c133012.graph_c2;c137667.graph_c0
GO:0046916	cellular transition metal ion homeostasis	16	0.00025	BP	c102058.graph_c0;c102202.graph_c0;c111539.graph_c0;c116065.graph_c1;c116114.graph_c0;c121231.graph_c0;c123200.graph_c0;c124918.graph_c0;c126288.graph_c0;c129237.graph_c0;c131974.graph_c3;c132136.graph_c2;c68188.graph_c0;c69255.graph_c0;c81559.graph_c0;c96558.graph_c0
GO:0044707	single-multicellular organism process	141	0.00027	BP	c101119.graph_c0;c101457.graph_c0;c101502.graph_c0;c101622.graph_c0;c102823.graph_c2;c103086.graph_c1;c103294.graph_c0;c104356.graph_c0;c105018.graph_c0;c105569.graph_c0;c106430.graph_c0;c106921.graph_c0;c108150.graph_c1;c109069.graph_c0;c109456.graph_c1;c109456.graph_c2;c110712.graph_c0;c111536.graph_c0;c112098.graph_c0;c112501.graph_c0;c112776.graph_c0;c113220.graph_c0;c113650.graph_c0;c114057.…
GO:0009826	unidimensional cell growth	11	0.00027	BP	c102910.graph_c0;c104850.graph_c0;c112501.graph_c0;c118846.graph_c0;c121924.graph_c0;c138381.graph_c0;c67944.graph_c0;c68838.graph_c0;c69056.graph_c0;c80885.graph_c0;c95938.graph_c1
GO:0048481	ovule development	1	0.0003	BP	c130921.graph_c0
GO:0098542	defense response to other organism	19	0.00031	BP	c108625.graph_c0;c113973.graph_c0;c116628.graph_c0;c118196.graph_c0;c118557.graph_c0;c119100.graph_c0;c124853.graph_c0;c128525.graph_c0;c131161.graph_c0;c131660.graph_c0;c132205.graph_c0;c133399.graph_c0;c135597.graph_c0;c136093.graph_c2;c138080.graph_c0;c75324.graph_c0;c83063.graph_c0;c86432.graph_c0;c88560.graph_c0
GO:0010119	regulation of stomatal movement	5	0.00032	BP	c125038.graph_c0;c126611.graph_c0;c126804.graph_c0;c127626.graph_c0;c136393.graph_c2
GO:0042545	cell wall modification	15	0.00037	BP	c113548.graph_c1;c117515.graph_c0;c121515.graph_c0;c122320.graph_c0;c122875.graph_c0;c122875.graph_c1;c122875.graph_c2;c124079.graph_c0;c129689.graph_c1;c130429.graph_c0;c130954.graph_c0;c132288.graph_c2;c136104.graph_c0;c138648.graph_c0;c88105.graph_c0
GO:0048366	leaf development	13	0.00037	BP	c119082.graph_c0;c122054.graph_c0;c126962.graph_c0;c131824.graph_c0;c131867.graph_c0;c132172.graph_c1;c132980.graph_c0;c134634.graph_c3;c136174.graph_c2;c136656.graph_c0;c67862.graph_c1;c80683.graph_c0;c88560.graph_c0
GO:0010087	phloem or xylem histogenesis	7	0.00041	BP	c104369.graph_c0;c112776.graph_c0;c113220.graph_c0;c118584.graph_c0;c67808.graph_c0;c68379.graph_c0;c92524.graph_c0
GO:0019684	photosynthesis, light reaction	25	0.00052	BP	c103437.graph_c0;c111152.graph_c0;c111429.graph_c0;c111971.graph_c0;c118248.graph_c0;c124837.graph_c0;c126987.graph_c1;c128754.graph_c0;c129146.graph_c0;c131184.graph_c0;c131334.graph_c0;c131342.graph_c0;c132332.graph_c0;c132561.graph_c0;c132561.graph_c2;c132810.graph_c0;c133456.graph_c0;c134486.graph_c0;c134948.graph_c0;c135031.graph_c0;c135031.graph_c1;c135628.graph_c0;c136893.graph_c0;c81752.g…
GO:0019252	starch biosynthetic process	11	0.00056	BP	c101674.graph_c0;c101674.graph_c1;c120383.graph_c0;c120772.graph_c0;c120772.graph_c1;c122476.graph_c0;c130652.graph_c0;c134161.graph_c6;c134328.graph_c0;c135484.graph_c1;c93290.graph_c0
GO:0007018	microtubule-based movement	25	0.00077	BP	c114448.graph_c0;c116573.graph_c1;c124681.graph_c4;c126471.graph_c0;c126928.graph_c0;c127462.graph_c0;c127533.graph_c0;c128910.graph_c1;c130357.graph_c1;c130571.graph_c0;c132151.graph_c0;c132278.graph_c0;c133059.graph_c0;c133258.graph_c0;c133898.graph_c4;c134416.graph_c0;c134791.graph_c0;c134909.graph_c0;c135971.graph_c0;c136529.graph_c0;c136811.graph_c0;c137061.graph_c1;c145562.graph_c0;c67759.g…
GO:0045087	innate immune response	6	0.00087	BP	c111522.graph_c0;c131660.graph_c0;c133399.graph_c0;c135928.graph_c0;c136093.graph_c2;c86432.graph_c0
GO:0010207	photosystem II assembly	1	0.001	BP	c131342.graph_c0
GO:0009657	plastid organization	2	0.00103	BP	c126987.graph_c1;c134948.graph_c0
GO:0009867	jasmonic acid mediated signaling pathway	2	0.00107	BP	c101622.graph_c0;c136093.graph_c2
GO:0048831	regulation of shoot system development	7	0.0011	BP	c118777.graph_c0;c121422.graph_c0;c121805.graph_c0;c128525.graph_c0;c138712.graph_c0;c80611.graph_c0;c91712.graph_c0
GO:0010075	regulation of meristem growth	3	0.00124	BP	c110712.graph_c0;c121422.graph_c0;c133004.graph_c0
GO:0042787	protein ubiquitination involved in ubiquitin-dependent protein catabolic process	3	0.00127	BP	c114497.graph_c0;c129742.graph_c0;c130376.graph_c1
GO:0051762	sesquiterpene biosynthetic process	4	0.00139	BP	c132048.graph_c0;c132709.graph_c0;c135931.graph_c0;c136512.graph_c0
GO:0009723	response to ethylene	4	0.00141	BP	c101622.graph_c0;c126611.graph_c0;c133786.graph_c0;c138674.graph_c0
GO:0009593	detection of chemical stimulus	1	0.00144	BP	c124922.graph_c0
GO:0010206	photosystem II repair	3	0.00148	BP	c126987.graph_c1;c131342.graph_c0;c134948.graph_c0
GO:0009738	abscisic acid-activated signaling pathway	10	0.0015	BP	c100878.graph_c0;c101686.graph_c1;c111577.graph_c0;c116370.graph_c0;c122115.graph_c0;c122306.graph_c0;c127545.graph_c1;c130443.graph_c0;c131107.graph_c1;c131161.graph_c0
GO:0043693	monoterpene biosynthetic process	4	0.00151	BP	c111262.graph_c0;c122670.graph_c0;c130367.graph_c0;c137718.graph_c2
GO:0009888	tissue development	40	0.00153	BP	c101457.graph_c0;c104369.graph_c0;c105018.graph_c0;c106430.graph_c0;c110712.graph_c0;c112776.graph_c0;c113220.graph_c0;c113220.graph_c2;c116465.graph_c0;c116821.graph_c0;c117956.graph_c1;c118584.graph_c0;c120548.graph_c0;c120951.graph_c0;c121422.graph_c0;c122685.graph_c0;c122879.graph_c0;c123108.graph_c0;c124504.graph_c1;c127743.graph_c0;c128218.graph_c0;c128525.graph_c0;c130013.graph_c1;c131874.…
GO:2000377	regulation of reactive oxygen species metabolic process	2	0.00163	BP	c101622.graph_c0;c132205.graph_c0
GO:0009651	response to salt stress	13	0.00166	BP	c101622.graph_c0;c111577.graph_c0;c120312.graph_c0;c120312.graph_c2;c120550.graph_c0;c122054.graph_c0;c131107.graph_c1;c131408.graph_c0;c132421.graph_c0;c134054.graph_c1;c134982.graph_c1;c136174.graph_c2;c83759.graph_c1
GO:0010411	xyloglucan metabolic process	8	0.00166	BP	c113465.graph_c0;c121170.graph_c0;c121924.graph_c0;c123621.graph_c0;c124923.graph_c0;c66679.graph_c0;c68177.graph_c0;c90963.graph_c1
GO:0048868	pollen tube development	7	0.00173	BP	c102910.graph_c0;c112501.graph_c0;c118846.graph_c0;c127796.graph_c0;c138792.graph_c0;c69056.graph_c0;c95938.graph_c1
GO:0006032	chitin catabolic process	9	0.00176	BP	c106034.graph_c0;c106034.graph_c2;c111144.graph_c0;c120779.graph_c0;c125425.graph_c1;c127067.graph_c0;c136667.graph_c1;c75446.graph_c0;c80643.graph_c1
GO:0000911	cytokinesis by cell plate formation	4	0.00183	BP	c125197.graph_c0;c132509.graph_c0;c134909.graph_c0;c94866.graph_c0
GO:0033383	geranyl diphosphate metabolic process	5	0.00185	BP	c111262.graph_c0;c122670.graph_c0;c130367.graph_c0;c137718.graph_c2;c69804.graph_c1
GO:0009886	post-embryonic morphogenesis	17	0.00191	BP	c116465.graph_c0;c116628.graph_c0;c116821.graph_c0;c124504.graph_c1;c127743.graph_c0;c128218.graph_c0;c128410.graph_c0;c131514.graph_c2;c131824.graph_c0;c132891.graph_c0;c132891.graph_c1;c138712.graph_c0;c138924.graph_c0;c70211.graph_c0;c80611.graph_c0;c88560.graph_c0;c99247.graph_c0
GO:0042744	hydrogen peroxide catabolic process	30	0.00192	BP	c114692.graph_c0;c116946.graph_c1;c118987.graph_c0;c120010.graph_c0;c120641.graph_c0;c121968.graph_c1;c123187.graph_c0;c124104.graph_c0;c124612.graph_c0;c124679.graph_c0;c125705.graph_c0;c125796.graph_c0;c127670.graph_c0;c129215.graph_c0;c130136.graph_c1;c130311.graph_c0;c131976.graph_c0;c134203.graph_c0;c136206.graph_c0;c137025.graph_c0;c137419.graph_c0;c138472.graph_c0;c138896.graph_c0;c141209.…
GO:0000059	protein import into nucleus, docking	2	0.00195	BP	c136865.graph_c0;c89851.graph_c0
GO:0009742	brassinosteroid mediated signaling pathway	4	0.00196	BP	c120570.graph_c0;c131346.graph_c1;c131346.graph_c2;c134370.graph_c0
GO:0010588	cotyledon vascular tissue pattern formation	5	0.00207	BP	c112776.graph_c0;c121723.graph_c0;c128587.graph_c0;c132421.graph_c0;c92524.graph_c0
GO:0042445	hormone metabolic process	14	0.00228	BP	c103271.graph_c0;c103294.graph_c0;c104356.graph_c0;c114108.graph_c0;c116963.graph_c0;c117105.graph_c0;c125682.graph_c0;c126590.graph_c1;c131956.graph_c0;c132488.graph_c0;c133876.graph_c0;c137368.graph_c1;c137510.graph_c1;c138381.graph_c0
GO:0002218	activation of innate immune response	1	0.00234	BP	c136093.graph_c2
GO:0048438	floral whorl development	6	0.00235	BP	c112098.graph_c0;c122879.graph_c0;c125214.graph_c0;c128218.graph_c0;c128609.graph_c0;c130921.graph_c0
GO:0009809	lignin biosynthetic process	10	0.00236	BP	c100905.graph_c0;c115829.graph_c1;c123523.graph_c0;c124026.graph_c1;c128556.graph_c0;c131292.graph_c0;c131292.graph_c1;c136104.graph_c0;c68993.graph_c0;c92168.graph_c0
GO:0007275	multicellular organismal development	133	0.00267	BP	c101119.graph_c0;c101457.graph_c0;c101502.graph_c0;c101622.graph_c0;c102823.graph_c2;c103086.graph_c1;c103294.graph_c0;c104356.graph_c0;c105018.graph_c0;c105569.graph_c0;c106430.graph_c0;c106921.graph_c0;c108150.graph_c1;c109069.graph_c0;c109456.graph_c1;c109456.graph_c2;c110712.graph_c0;c111536.graph_c0;c112098.graph_c0;c112776.graph_c0;c113220.graph_c0;c113650.graph_c0;c114057.graph_c0;c115901.…
GO:0018108	peptidyl-tyrosine phosphorylation	8	0.00274	BP	c118272.graph_c0;c126446.graph_c0;c128324.graph_c1;c132314.graph_c0;c133917.graph_c2;c134686.graph_c0;c135799.graph_c0;c83678.graph_c0
GO:0009856	pollination	12	0.00276	BP	c102910.graph_c0;c112501.graph_c0;c118846.graph_c0;c127006.graph_c0;c127796.graph_c0;c127889.graph_c0;c134787.graph_c1;c136201.graph_c0;c136494.graph_c2;c138792.graph_c0;c69056.graph_c0;c95938.graph_c1
GO:0009814	defense response, incompatible interaction	2	0.00283	BP	c133399.graph_c0;c86432.graph_c0
GO:0009640	photomorphogenesis	2	0.00296	BP	c122077.graph_c0;c128609.graph_c0
GO:0006014	D-ribose metabolic process	3	0.00302	BP	c101880.graph_c0;c122476.graph_c0;c137698.graph_c0
GO:0048827	phyllome development	21	0.00313	BP	c112098.graph_c0;c113650.graph_c0;c119082.graph_c0;c122054.graph_c0;c122275.graph_c0;c122879.graph_c0;c125214.graph_c0;c126962.graph_c0;c128218.graph_c0;c128609.graph_c0;c130921.graph_c0;c131824.graph_c0;c131867.graph_c0;c132172.graph_c1;c132980.graph_c0;c134634.graph_c3;c136174.graph_c2;c136656.graph_c0;c67862.graph_c1;c80683.graph_c0;c88560.graph_c0
GO:0010150	leaf senescence	3	0.00323	BP	c119082.graph_c0;c131867.graph_c0;c136656.graph_c0
GO:0045682	regulation of epidermis development	3	0.00327	BP	c116465.graph_c0;c130013.graph_c1;c138924.graph_c0
GO:0048527	lateral root development	6	0.0034	BP	c106430.graph_c0;c116628.graph_c0;c128410.graph_c0;c131514.graph_c2;c70211.graph_c0;c99247.graph_c0
GO:0010073	meristem maintenance	6	0.0035	BP	c110712.graph_c0;c117956.graph_c1;c121422.graph_c0;c122879.graph_c0;c128218.graph_c0;c133004.graph_c0
GO:0003002	regionalization	22	0.00356	BP	c105569.graph_c0;c106921.graph_c0;c111536.graph_c0;c112776.graph_c0;c118523.graph_c0;c121723.graph_c0;c128218.graph_c0;c128587.graph_c0;c130013.graph_c1;c131824.graph_c0;c132028.graph_c1;c132172.graph_c1;c132421.graph_c0;c133786.graph_c0;c138712.graph_c0;c138924.graph_c0;c80611.graph_c0;c80683.graph_c0;c88560.graph_c0;c92524.graph_c0;c94866.graph_c0;c95666.graph_c0
GO:0048367	shoot system development	50	0.00362	BP	c105018.graph_c0;c112098.graph_c0;c113650.graph_c0;c115901.graph_c0;c116465.graph_c0;c116821.graph_c0;c117906.graph_c0;c117956.graph_c1;c118777.graph_c0;c119082.graph_c0;c120548.graph_c0;c120718.graph_c0;c121422.graph_c0;c121805.graph_c0;c122054.graph_c0;c122275.graph_c0;c122879.graph_c0;c123962.graph_c0;c124504.graph_c1;c125214.graph_c0;c126962.graph_c0;c127743.graph_c0;c128218.graph_c0;c128525.…
GO:0048580	regulation of post-embryonic development	14	0.0037	BP	c101622.graph_c0;c116465.graph_c0;c118777.graph_c0;c121422.graph_c0;c121805.graph_c0;c122275.graph_c0;c128525.graph_c0;c130013.graph_c1;c135597.graph_c0;c135654.graph_c0;c138712.graph_c0;c138924.graph_c0;c80611.graph_c0;c91712.graph_c0
GO:0019511	peptidyl-proline hydroxylation	1	0.00371	BP	c108903.graph_c0
GO:0010015	root morphogenesis	10	0.00379	BP	c101457.graph_c0;c106430.graph_c0;c110712.graph_c0;c116628.graph_c0;c128410.graph_c0;c128525.graph_c0;c131514.graph_c2;c67862.graph_c1;c70211.graph_c0;c99247.graph_c0
GO:0010109	regulation of photosynthesis	4	0.00414	BP	c126987.graph_c1;c134948.graph_c0;c136893.graph_c0;c91116.graph_c0
GO:0010374	stomatal complex development	10	0.00416	BP	c116465.graph_c0;c116821.graph_c0;c124504.graph_c1;c127743.graph_c0;c130013.graph_c1;c132891.graph_c0;c132891.graph_c1;c138924.graph_c0;c88560.graph_c0;c95303.graph_c0
GO:0010067	procambium histogenesis	3	0.00419	BP	c113220.graph_c0;c118584.graph_c0;c68379.graph_c0
GO:0006955	immune response	10	0.00436	BP	c101457.graph_c0;c111522.graph_c0;c113371.graph_c0;c121805.graph_c0;c129895.graph_c0;c131660.graph_c0;c133399.graph_c0;c135928.graph_c0;c136093.graph_c2;c86432.graph_c0
GO:0009631	cold acclimation	1	0.00445	BP	c122804.graph_c0
GO:0009853	photorespiration	3	0.00451	BP	c118879.graph_c0;c132242.graph_c0;c68289.graph_c0
GO:0048581	negative regulation of post-embryonic development	3	0.00464	BP	c101622.graph_c0;c116465.graph_c0;c138924.graph_c0
GO:0009630	gravitropism	3	0.0047	BP	c128609.graph_c0;c131824.graph_c0;c67862.graph_c1
GO:0009767	photosynthetic electron transport chain	4	0.00486	BP	c118248.graph_c0;c126987.graph_c1;c133456.graph_c0;c134948.graph_c0
GO:0010928	regulation of auxin mediated signaling pathway	3	0.00504	BP	c128609.graph_c0;c132172.graph_c1;c138381.graph_c0
GO:0009561	megagametogenesis	3	0.00512	BP	c122923.graph_c0;c130376.graph_c1;c134909.graph_c0
GO:0006826	iron ion transport	4	0.00516	BP	c109311.graph_c0;c116114.graph_c0;c126288.graph_c0;c132136.graph_c2
GO:0010501	RNA secondary structure unwinding	5	0.00529	BP	c107263.graph_c0;c126373.graph_c0;c134724.graph_c0;c138708.graph_c0;c82669.graph_c0
GO:0009956	radial pattern formation	3	0.00543	BP	c105569.graph_c0;c118523.graph_c0;c80683.graph_c0
GO:0010305	leaf vascular tissue pattern formation	4	0.00543	BP	c112776.graph_c0;c132028.graph_c1;c132172.graph_c1;c92524.graph_c0
GO:0009553	embryo sac development	3	0.00547	BP	c122923.graph_c0;c130376.graph_c1;c134909.graph_c0
GO:0006809	nitric oxide biosynthetic process	4	0.00561	BP	c110110.graph_c0;c124735.graph_c0;c124735.graph_c1;c133652.graph_c0
GO:0009834	secondary cell wall biogenesis	7	0.00565	BP	c108625.graph_c0;c109967.graph_c0;c118196.graph_c0;c123653.graph_c0;c128318.graph_c0;c133457.graph_c0;c138381.graph_c0
GO:0015994	chlorophyll metabolic process	4	0.00577	BP	c117513.graph_c0;c121767.graph_c0;c123815.graph_c0;c125978.graph_c0
GO:0009943	adaxial/abaxial axis specification	3	0.00588	BP	c111536.graph_c0;c88560.graph_c0;c95666.graph_c0
GO:0097080	plasma membrane selenite transport	3	0.00631	BP	c132487.graph_c1;c133914.graph_c0;c133914.graph_c1
GO:0019253	reductive pentose-phosphate cycle	5	0.00641	BP	c120383.graph_c0;c126220.graph_c1;c130652.graph_c0;c134924.graph_c0;c136768.graph_c0
GO:0006270	DNA replication initiation	10	0.00686	BP	c110712.graph_c0;c111829.graph_c0;c118020.graph_c0;c121988.graph_c0;c130706.graph_c0;c131995.graph_c0;c133955.graph_c2;c135933.graph_c0;c135963.graph_c0;c67706.graph_c0
GO:0009751	response to salicylic acid	4	0.00687	BP	c101622.graph_c0;c119100.graph_c0;c121924.graph_c0;c138958.graph_c0
GO:0015791	polyol transport	5	0.00692	BP	c101127.graph_c0;c101700.graph_c0;c132654.graph_c1;c138139.graph_c0;c83669.graph_c0
GO:0035194	posttranscriptional gene silencing by RNA	3	0.00698	BP	c127273.graph_c0;c131660.graph_c0;c132028.graph_c1
GO:0009845	seed germination	6	0.00715	BP	c101622.graph_c0;c109069.graph_c0;c128525.graph_c0;c131408.graph_c0;c132998.graph_c0;c135597.graph_c0
GO:0010102	lateral root morphogenesis	5	0.0072	BP	c116628.graph_c0;c128410.graph_c0;c131514.graph_c2;c70211.graph_c0;c99247.graph_c0
GO:2000280	regulation of root development	2	0.00725	BP	c110712.graph_c0;c138950.graph_c0
GO:0006624	vacuolar protein processing	2	0.00737	BP	c121375.graph_c1;c138094.graph_c0
GO:0052889	9,9'-di-cis-zeta-carotene desaturation to 7,9,7',9'-tetra-cis-lycopene	4	0.00738	BP	c100488.graph_c0;c121257.graph_c0;c129709.graph_c0;c137873.graph_c1
GO:0048235	pollen sperm cell differentiation	4	0.00755	BP	c102823.graph_c2;c103086.graph_c1;c125334.graph_c1;c138279.graph_c0
GO:0042335	cuticle development	4	0.00755	BP	c102823.graph_c2;c125334.graph_c1;c129068.graph_c0;c138279.graph_c0
GO:0010052	guard cell differentiation	4	0.00773	BP	c116465.graph_c0;c116821.graph_c0;c127743.graph_c0;c138924.graph_c0
GO:0046271	phenylpropanoid catabolic process	7	0.00831	BP	c116265.graph_c0;c123523.graph_c0;c131292.graph_c0;c131292.graph_c1;c136104.graph_c0;c68993.graph_c0;c97583.graph_c0
GO:0009908	flower development	22	0.0084	BP	c105018.graph_c0;c112098.graph_c0;c115901.graph_c0;c117906.graph_c0;c117956.graph_c1;c118777.graph_c0;c120548.graph_c0;c120718.graph_c0;c121422.graph_c0;c121805.graph_c0;c122275.graph_c0;c122879.graph_c0;c123962.graph_c0;c125214.graph_c0;c128218.graph_c0;c128609.graph_c0;c130921.graph_c0;c131824.graph_c0;c133004.graph_c0;c138712.graph_c0;c80611.graph_c0;c91712.graph_c0
GO:0009933	meristem structural organization	2	0.00867	BP	c138712.graph_c0;c80611.graph_c0
GO:0008356	asymmetric cell division	3	0.00867	BP	c125237.graph_c0;c131514.graph_c2;c80683.graph_c0
GO:0048316	seed development	20	0.0089	BP	c101622.graph_c0;c110712.graph_c0;c113220.graph_c0;c116183.graph_c0;c118584.graph_c0;c123108.graph_c0;c124909.graph_c3;c125312.graph_c0;c126249.graph_c0;c131116.graph_c0;c131514.graph_c2;c131824.graph_c0;c133786.graph_c0;c135597.graph_c0;c135646.graph_c0;c135850.graph_c1;c137619.graph_c0;c67862.graph_c1;c68379.graph_c0;c94866.graph_c0
GO:0009725	response to hormone	62	0.00902	BP	c100214.graph_c0;c100878.graph_c0;c101622.graph_c0;c101686.graph_c1;c109069.graph_c0;c111577.graph_c0;c112593.graph_c0;c113966.graph_c0;c115953.graph_c0;c116370.graph_c0;c117956.graph_c1;c119431.graph_c0;c120293.graph_c0;c120570.graph_c0;c120718.graph_c0;c122115.graph_c0;c122275.graph_c0;c122306.graph_c0;c122471.graph_c0;c123962.graph_c0;c123962.graph_c1;c124780.graph_c0;c125237.graph_c0;c126590.…
GO:0005983	starch catabolic process	1	0.00911	BP	c122804.graph_c0
GO:0010089	xylem development	3	0.00916	BP	c104369.graph_c0;c67808.graph_c0;c68379.graph_c0
GO:0010103	stomatal complex morphogenesis	8	0.00917	BP	c116465.graph_c0;c116821.graph_c0;c124504.graph_c1;c127743.graph_c0;c132891.graph_c0;c132891.graph_c1;c138924.graph_c0;c88560.graph_c0
GO:0032870	cellular response to hormone stimulus	42	0.0092	BP	c100214.graph_c0;c100878.graph_c0;c101622.graph_c0;c101686.graph_c1;c111577.graph_c0;c113966.graph_c0;c115953.graph_c0;c116370.graph_c0;c117956.graph_c1;c119431.graph_c0;c120293.graph_c0;c120570.graph_c0;c120718.graph_c0;c122115.graph_c0;c122306.graph_c0;c123962.graph_c0;c123962.graph_c1;c124780.graph_c0;c126590.graph_c1;c127545.graph_c1;c128525.graph_c0;c128609.graph_c0;c130443.graph_c0;c130661.…
GO:0009555	pollen development	8	0.00948	BP	c102823.graph_c2;c103086.graph_c1;c125334.graph_c1;c126249.graph_c0;c132698.graph_c0;c134909.graph_c0;c138279.graph_c0;c69056.graph_c0
GO:0071421	manganese ion transmembrane transport	4	0.00954	BP	c132487.graph_c1;c133914.graph_c0;c133914.graph_c1;c96558.graph_c0
GO:0016131	brassinosteroid metabolic process	6	0.01014	BP	c103271.graph_c0;c103294.graph_c0;c104356.graph_c0;c117105.graph_c0;c125682.graph_c0;c131956.graph_c0
GO:0045492	xylan biosynthetic process	3	0.01045	BP	c109967.graph_c0;c125103.graph_c0;c131043.graph_c1
GO:0009451	RNA modification	12	0.01067	BP	c124100.graph_c0;c127198.graph_c1;c128948.graph_c0;c129048.graph_c0;c130906.graph_c0;c130952.graph_c0;c132597.graph_c0;c134942.graph_c0;c136131.graph_c1;c137713.graph_c0;c138722.graph_c0;c90513.graph_c0
GO:0018193	peptidyl-amino acid modification	37	0.0107	BP	c100878.graph_c0;c101686.graph_c1;c108903.graph_c0;c112778.graph_c0;c113548.graph_c1;c114271.graph_c0;c117010.graph_c0;c118272.graph_c0;c122804.graph_c0;c123047.graph_c0;c123290.graph_c0;c124922.graph_c0;c126101.graph_c0;c126446.graph_c0;c126562.graph_c0;c127616.graph_c0;c128324.graph_c1;c128525.graph_c0;c129365.graph_c0;c129854.graph_c1;c130443.graph_c0;c130497.graph_c0;c131712.graph_c1;c131798.…
GO:0042044	fluid transport	7	0.01082	BP	c101127.graph_c0;c101700.graph_c0;c125119.graph_c0;c132654.graph_c1;c138139.graph_c0;c83669.graph_c0;c88560.graph_c0
GO:0006833	water transport	7	0.01082	BP	c101127.graph_c0;c101700.graph_c0;c125119.graph_c0;c132654.graph_c1;c138139.graph_c0;c83669.graph_c0;c88560.graph_c0
GO:0030104	water homeostasis	5	0.01082	BP	c101127.graph_c0;c101700.graph_c0;c132654.graph_c1;c138139.graph_c0;c83669.graph_c0
GO:0045596	negative regulation of cell differentiation	3	0.01099	BP	c105018.graph_c0;c122879.graph_c0;c128218.graph_c0
GO:0072583	clathrin-mediated endocytosis	1	0.01137	BP	c94866.graph_c0
GO:2000038	regulation of stomatal complex development	3	0.01153	BP	c116465.graph_c0;c130013.graph_c1;c138924.graph_c0
GO:0010375	stomatal complex patterning	3	0.01153	BP	c130013.graph_c1;c133786.graph_c0;c138924.graph_c0
GO:0006545	glycine biosynthetic process	1	0.01198	BP	c100733.graph_c0
GO:0065001	specification of axis polarity	1	0.01201	BP	c88560.graph_c0
GO:0009624	response to nematode	2	0.0121	BP	c134982.graph_c1;c86432.graph_c0
GO:0010027	thylakoid membrane organization	2	0.0126	BP	c126987.graph_c1;c134948.graph_c0
GO:0009668	plastid membrane organization	2	0.0126	BP	c126987.graph_c1;c134948.graph_c0
GO:0019464	glycine decarboxylation via glycine cleavage system	4	0.01267	BP	c115897.graph_c0;c125325.graph_c0;c133526.graph_c0;c67882.graph_c1
GO:0009765	photosynthesis, light harvesting	22	0.01289	BP	c103437.graph_c0;c111152.graph_c0;c111429.graph_c0;c111971.graph_c0;c124837.graph_c0;c126987.graph_c1;c128754.graph_c0;c129146.graph_c0;c131184.graph_c0;c131334.graph_c0;c131342.graph_c0;c132332.graph_c0;c132561.graph_c0;c132561.graph_c2;c132810.graph_c0;c134486.graph_c0;c134948.graph_c0;c135031.graph_c0;c135031.graph_c1;c135628.graph_c0;c81752.graph_c0;c81752.graph_c2
GO:0051606	detection of stimulus	2	0.01306	BP	c124922.graph_c0;c134910.graph_c4
GO:0000904	cell morphogenesis involved in differentiation	13	0.01317	BP	c102910.graph_c0;c105018.graph_c0;c112501.graph_c0;c118846.graph_c0;c120951.graph_c0;c122685.graph_c0;c131874.graph_c1;c136689.graph_c2;c139058.graph_c0;c67862.graph_c1;c69056.graph_c0;c94866.graph_c0;c95938.graph_c1
GO:0009409	response to cold	5	0.01376	BP	c122804.graph_c0;c128754.graph_c0;c132998.graph_c4;c134924.graph_c0;c135654.graph_c0
GO:0048589	developmental growth	17	0.01386	BP	c102910.graph_c0;c104850.graph_c0;c110712.graph_c0;c112501.graph_c0;c118846.graph_c0;c121422.graph_c0;c121924.graph_c0;c133004.graph_c0;c138381.graph_c0;c138712.graph_c0;c67862.graph_c1;c67944.graph_c0;c68838.graph_c0;c69056.graph_c0;c80611.graph_c0;c80885.graph_c0;c95938.graph_c1
GO:0045229	external encapsulating structure organization	89	0.01387	BP	c100585.graph_c0;c102309.graph_c0;c103343.graph_c0;c108625.graph_c0;c110434.graph_c0;c113465.graph_c0;c113548.graph_c1;c115960.graph_c0;c116412.graph_c0;c116412.graph_c1;c116525.graph_c0;c116817.graph_c0;c117146.graph_c0;c117515.graph_c0;c118196.graph_c0;c118552.graph_c0;c119853.graph_c0;c120010.graph_c0;c120081.graph_c0;c120409.graph_c0;c120409.graph_c1;c120550.graph_c0;c120554.graph_c1;c120554.…
GO:0009932	cell tip growth	6	0.01404	BP	c102910.graph_c0;c104850.graph_c0;c112501.graph_c0;c118846.graph_c0;c69056.graph_c0;c95938.graph_c1
GO:0015693	magnesium ion transport	3	0.01404	BP	c126577.graph_c0;c127535.graph_c0;c136995.graph_c3
GO:0010091	trichome branching	3	0.01434	BP	c131874.graph_c1;c139058.graph_c0;c94866.graph_c0
GO:0018208	peptidyl-proline modification	11	0.01434	BP	c108903.graph_c0;c123290.graph_c0;c126562.graph_c0;c127616.graph_c0;c129365.graph_c0;c130497.graph_c0;c131712.graph_c1;c131798.graph_c0;c135286.graph_c0;c135328.graph_c0;c138204.graph_c0
GO:0046500	S-adenosylmethionine metabolic process	2	0.01451	BP	c103406.graph_c0;c132779.graph_c0
GO:0006633	fatty acid biosynthetic process	36	0.01482	BP	c100963.graph_c0;c102823.graph_c2;c106997.graph_c0;c112171.graph_c0;c112311.graph_c0;c112311.graph_c1;c115353.graph_c0;c115522.graph_c0;c115522.graph_c1;c116625.graph_c0;c116940.graph_c0;c116940.graph_c1;c117080.graph_c0;c119491.graph_c0;c119683.graph_c0;c120441.graph_c0;c121487.graph_c1;c121987.graph_c0;c121987.graph_c1;c125004.graph_c0;c125334.graph_c1;c125541.graph_c0;c125801.graph_c1;c126223.…
GO:0048863	stem cell differentiation	2	0.01528	BP	c122879.graph_c0;c128218.graph_c0
GO:0046777	protein autophosphorylation	4	0.0156	BP	c100878.graph_c0;c101686.graph_c1;c122739.graph_c1;c130443.graph_c0
GO:0071555	cell wall organization	87	0.01572	BP	c100585.graph_c0;c102309.graph_c0;c103343.graph_c0;c108625.graph_c0;c110434.graph_c0;c113465.graph_c0;c113548.graph_c1;c115960.graph_c0;c116412.graph_c0;c116412.graph_c1;c116525.graph_c0;c116817.graph_c0;c117146.graph_c0;c117515.graph_c0;c118196.graph_c0;c118552.graph_c0;c119853.graph_c0;c120010.graph_c0;c120081.graph_c0;c120409.graph_c0;c120409.graph_c1;c120550.graph_c0;c120554.graph_c1;c120554.…
GO:0048444	floral organ morphogenesis	2	0.01592	BP	c138712.graph_c0;c80611.graph_c0
GO:0048563	post-embryonic organ morphogenesis	2	0.01592	BP	c138712.graph_c0;c80611.graph_c0
GO:0019748	secondary metabolic process	53	0.01608	BP	c100354.graph_c0;c100905.graph_c0;c103626.graph_c1;c105072.graph_c0;c107374.graph_c0;c109918.graph_c0;c109918.graph_c1;c110642.graph_c0;c113197.graph_c0;c114744.graph_c0;c115829.graph_c1;c116265.graph_c0;c117626.graph_c0;c118282.graph_c1;c119914.graph_c0;c120013.graph_c0;c120671.graph_c0;c121631.graph_c1;c123042.graph_c0;c123523.graph_c0;c124026.graph_c1;c124632.graph_c0;c125063.graph_c4;c125180.…
GO:0007205	protein kinase C-activating G-protein coupled receptor signaling pathway	3	0.01616	BP	c129412.graph_c0;c132980.graph_c0;c136746.graph_c0
GO:0009694	jasmonic acid metabolic process	1	0.01618	BP	c136093.graph_c2
GO:0009755	hormone-mediated signaling pathway	42	0.01629	BP	c100214.graph_c0;c100878.graph_c0;c101622.graph_c0;c101686.graph_c1;c111577.graph_c0;c113966.graph_c0;c115953.graph_c0;c116370.graph_c0;c117956.graph_c1;c119431.graph_c0;c120293.graph_c0;c120570.graph_c0;c120718.graph_c0;c122115.graph_c0;c122306.graph_c0;c123962.graph_c0;c123962.graph_c1;c124780.graph_c0;c126590.graph_c1;c127545.graph_c1;c128525.graph_c0;c128609.graph_c0;c130443.graph_c0;c130661.…
GO:0015793	glycerol transport	5	0.01633	BP	c101127.graph_c0;c101700.graph_c0;c132654.graph_c1;c138139.graph_c0;c83669.graph_c0
GO:0031347	regulation of defense response	3	0.0164	BP	c119100.graph_c0;c131161.graph_c0;c136093.graph_c2
GO:0009800	cinnamic acid biosynthetic process	2	0.01656	BP	c100354.graph_c0;c125063.graph_c4
GO:0009803	cinnamic acid metabolic process	2	0.01656	BP	c100354.graph_c0;c125063.graph_c4
GO:0048509	regulation of meristem development	5	0.01661	BP	c110712.graph_c0;c121422.graph_c0;c128525.graph_c0;c132698.graph_c0;c133004.graph_c0
GO:0042752	regulation of circadian rhythm	2	0.01688	BP	c132998.graph_c4;c135654.graph_c0
GO:0018198	peptidyl-cysteine modification	1	0.01798	BP	c124922.graph_c0
GO:0043414	macromolecule methylation	7	0.01818	BP	c105516.graph_c0;c125214.graph_c0;c131408.graph_c0;c133011.graph_c0;c134942.graph_c0;c136744.graph_c1;c137713.graph_c0
GO:0009812	flavonoid metabolic process	26	0.0184	BP	c100968.graph_c0;c106779.graph_c1;c110937.graph_c0;c112245.graph_c0;c113684.graph_c0;c113684.graph_c2;c113776.graph_c1;c118638.graph_c0;c120337.graph_c0;c120876.graph_c0;c124026.graph_c1;c126070.graph_c0;c126377.graph_c0;c126546.graph_c0;c128646.graph_c0;c131417.graph_c1;c132085.graph_c0;c133288.graph_c2;c133582.graph_c1;c136944.graph_c0;c137011.graph_c0;c138081.graph_c0;c68678.graph_c0;c78629.gr…
GO:1900865	chloroplast RNA modification	1	0.01841	BP	c130952.graph_c0
GO:2000027	regulation of organ morphogenesis	2	0.01842	BP	c114057.graph_c0;c88560.graph_c0
GO:0016132	brassinosteroid biosynthetic process	5	0.01865	BP	c103294.graph_c0;c104356.graph_c0;c117105.graph_c0;c125682.graph_c0;c131956.graph_c0
GO:0010268	brassinosteroid homeostasis	6	0.01865	BP	c103271.graph_c0;c103294.graph_c0;c104356.graph_c0;c117105.graph_c0;c125682.graph_c0;c131956.graph_c0
GO:0006556	S-adenosylmethionine biosynthetic process	1	0.0189	BP	c103406.graph_c0
GO:0032434	regulation of proteasomal ubiquitin-dependent protein catabolic process	1	0.01903	BP	c132698.graph_c0
GO:0009744	response to sucrose	2	0.01932	BP	c120993.graph_c0;c128525.graph_c0
GO:0034285	response to disaccharide	2	0.01932	BP	c120993.graph_c0;c128525.graph_c0
GO:0048588	developmental cell growth	6	0.01948	BP	c102910.graph_c0;c112501.graph_c0;c118846.graph_c0;c67862.graph_c1;c69056.graph_c0;c95938.graph_c1
GO:0060429	epithelium development	20	0.01986	BP	c101457.graph_c0;c105018.graph_c0;c106430.graph_c0;c116465.graph_c0;c116821.graph_c0;c120951.graph_c0;c122685.graph_c0;c124504.graph_c1;c127743.graph_c0;c130013.graph_c1;c131874.graph_c1;c132891.graph_c0;c132891.graph_c1;c136689.graph_c2;c138924.graph_c0;c139058.graph_c0;c67862.graph_c1;c88560.graph_c0;c94866.graph_c0;c95303.graph_c0
GO:0008544	epidermis development	20	0.01986	BP	c101457.graph_c0;c105018.graph_c0;c106430.graph_c0;c116465.graph_c0;c116821.graph_c0;c120951.graph_c0;c122685.graph_c0;c124504.graph_c1;c127743.graph_c0;c130013.graph_c1;c131874.graph_c1;c132891.graph_c0;c132891.graph_c1;c136689.graph_c2;c138924.graph_c0;c139058.graph_c0;c67862.graph_c1;c88560.graph_c0;c94866.graph_c0;c95303.graph_c0
GO:0043588	skin development	20	0.01986	BP	c101457.graph_c0;c105018.graph_c0;c106430.graph_c0;c116465.graph_c0;c116821.graph_c0;c120951.graph_c0;c122685.graph_c0;c124504.graph_c1;c127743.graph_c0;c130013.graph_c1;c131874.graph_c1;c132891.graph_c0;c132891.graph_c1;c136689.graph_c2;c138924.graph_c0;c139058.graph_c0;c67862.graph_c1;c88560.graph_c0;c94866.graph_c0;c95303.graph_c0
GO:0051093	negative regulation of developmental process	6	0.01993	BP	c101622.graph_c0;c105018.graph_c0;c116465.graph_c0;c122879.graph_c0;c128218.graph_c0;c138924.graph_c0
GO:0009789	positive regulation of abscisic acid-activated signaling pathway	3	0.02009	BP	c111577.graph_c0;c131107.graph_c1;c131161.graph_c0
GO:1901421	positive regulation of response to alcohol	3	0.02009	BP	c111577.graph_c0;c131107.graph_c1;c131161.graph_c0
GO:2000026	regulation of multicellular organismal development	20	0.02014	BP	c101622.graph_c0;c110712.graph_c0;c114057.graph_c0;c116465.graph_c0;c118777.graph_c0;c121422.graph_c0;c121805.graph_c0;c122275.graph_c0;c128525.graph_c0;c130013.graph_c1;c132698.graph_c0;c133004.graph_c0;c135597.graph_c0;c135654.graph_c0;c138712.graph_c0;c138924.graph_c0;c138950.graph_c0;c80611.graph_c0;c88560.graph_c0;c91712.graph_c0
GO:0031348	negative regulation of defense response	1	0.02089	BP	c131161.graph_c0
GO:0071368	cellular response to cytokinin stimulus	2	0.02123	BP	c113966.graph_c0;c128525.graph_c0
GO:0009736	cytokinin-activated signaling pathway	2	0.02123	BP	c113966.graph_c0;c128525.graph_c0
GO:0030001	metal ion transport	52	0.0213	BP	c100539.graph_c0;c102058.graph_c0;c102202.graph_c0;c104850.graph_c0;c104850.graph_c1;c109311.graph_c0;c111539.graph_c0;c112593.graph_c0;c116065.graph_c1;c116114.graph_c0;c116742.graph_c1;c118922.graph_c0;c119973.graph_c0;c120004.graph_c1;c120967.graph_c0;c122583.graph_c1;c123200.graph_c0;c123541.graph_c1;c124759.graph_c0;c124918.graph_c0;c125704.graph_c0;c125906.graph_c0;c125906.graph_c1;c126288.…
GO:0009644	response to high light intensity	3	0.02156	BP	c126987.graph_c1;c128754.graph_c0;c134948.graph_c0
GO:0007389	pattern specification process	23	0.02158	BP	c105569.graph_c0;c106921.graph_c0;c111536.graph_c0;c112776.graph_c0;c116183.graph_c0;c118523.graph_c0;c121723.graph_c0;c128218.graph_c0;c128587.graph_c0;c130013.graph_c1;c131824.graph_c0;c132028.graph_c1;c132172.graph_c1;c132421.graph_c0;c133786.graph_c0;c138712.graph_c0;c138924.graph_c0;c80611.graph_c0;c80683.graph_c0;c88560.graph_c0;c92524.graph_c0;c94866.graph_c0;c95666.graph_c0
GO:0043446	cellular alkane metabolic process	3	0.02159	BP	c102823.graph_c2;c125334.graph_c1;c138279.graph_c0
GO:0043447	alkane biosynthetic process	3	0.02159	BP	c102823.graph_c2;c125334.graph_c1;c138279.graph_c0
GO:0006723	cuticle hydrocarbon biosynthetic process	3	0.02159	BP	c102823.graph_c2;c125334.graph_c1;c138279.graph_c0
GO:0009992	cellular water homeostasis	5	0.02192	BP	c101127.graph_c0;c101700.graph_c0;c132654.graph_c1;c138139.graph_c0;c83669.graph_c0
GO:0010229	inflorescence development	5	0.02198	BP	c113650.graph_c0;c131824.graph_c0;c138712.graph_c0;c80611.graph_c0;c88560.graph_c0
GO:0048469	cell maturation	2	0.02206	BP	c101457.graph_c0;c67862.graph_c1
GO:0048764	trichoblast maturation	2	0.02206	BP	c101457.graph_c0;c67862.graph_c1
GO:0048765	root hair cell differentiation	2	0.02206	BP	c101457.graph_c0;c67862.graph_c1
GO:0010054	trichoblast differentiation	2	0.02206	BP	c101457.graph_c0;c67862.graph_c1
GO:0010311	lateral root formation	4	0.02206	BP	c116628.graph_c0;c131514.graph_c2;c70211.graph_c0;c99247.graph_c0
GO:0034050	host programmed cell death induced by symbiont	2	0.02217	BP	c111522.graph_c0;c135928.graph_c0
GO:0009626	plant-type hypersensitive response	2	0.02217	BP	c111522.graph_c0;c135928.graph_c0
GO:0060771	phyllotactic patterning	2	0.02221	BP	c105569.graph_c0;c118523.graph_c0
GO:0016311	dephosphorylation	45	0.02242	BP	c103086.graph_c1;c105091.graph_c0;c109069.graph_c0;c115265.graph_c3;c115901.graph_c0;c116370.graph_c0;c117906.graph_c0;c117933.graph_c0;c118077.graph_c0;c120383.graph_c0;c120570.graph_c0;c121289.graph_c0;c121482.graph_c0;c122115.graph_c0;c122306.graph_c0;c124255.graph_c1;c124987.graph_c0;c125007.graph_c0;c125651.graph_c0;c125794.graph_c1;c125827.graph_c0;c126095.graph_c0;c126198.graph_c0;c126220.…
GO:0043094	cellular metabolic compound salvage	10	0.02255	BP	c101761.graph_c0;c118879.graph_c0;c132242.graph_c0;c132331.graph_c0;c135133.graph_c0;c138505.graph_c0;c68289.graph_c0;c68424.graph_c0;c80824.graph_c0;c80824.graph_c2
GO:0009309	amine biosynthetic process	13	0.02261	BP	c103015.graph_c0;c111526.graph_c0;c115486.graph_c0;c118639.graph_c1;c121265.graph_c0;c122754.graph_c0;c124350.graph_c2;c125257.graph_c0;c133408.graph_c0;c135553.graph_c4;c67808.graph_c0;c69056.graph_c0;c83064.graph_c0
GO:0042401	cellular biogenic amine biosynthetic process	13	0.02261	BP	c103015.graph_c0;c111526.graph_c0;c115486.graph_c0;c118639.graph_c1;c121265.graph_c0;c122754.graph_c0;c124350.graph_c2;c125257.graph_c0;c133408.graph_c0;c135553.graph_c4;c67808.graph_c0;c69056.graph_c0;c83064.graph_c0
GO:0010118	stomatal movement	6	0.02268	BP	c125038.graph_c0;c126611.graph_c0;c126804.graph_c0;c127626.graph_c0;c131862.graph_c0;c136393.graph_c2
GO:0046174	polyol catabolic process	6	0.02332	BP	c109069.graph_c0;c116985.graph_c0;c123538.graph_c0;c132201.graph_c0;c136531.graph_c0;c98418.graph_c0
GO:0048511	rhythmic process	2	0.02342	BP	c132998.graph_c4;c135654.graph_c0
GO:0007623	circadian rhythm	2	0.02342	BP	c132998.graph_c4;c135654.graph_c0
GO:0016310	phosphorylation	275	0.02358	BP	c100878.graph_c0;c101170.graph_c1;c101614.graph_c0;c101686.graph_c0;c101686.graph_c1;c101880.graph_c0;c101900.graph_c0;c103491.graph_c0;c103748.graph_c0;c104110.graph_c0;c104420.graph_c0;c104507.graph_c0;c104561.graph_c0;c106838.graph_c0;c108728.graph_c0;c108728.graph_c1;c109977.graph_c0;c111122.graph_c0;c111380.graph_c0;c111626.graph_c0;c111670.graph_c0;c111992.graph_c2;c112344.graph_c1;c112365.…
GO:0009860	pollen tube growth	5	0.02394	BP	c102910.graph_c0;c112501.graph_c0;c118846.graph_c0;c69056.graph_c0;c95938.graph_c1
GO:0009875	pollen-pistil interaction	4	0.02412	BP	c127889.graph_c0;c134787.graph_c1;c136201.graph_c0;c136494.graph_c2
GO:0009850	auxin metabolic process	5	0.02427	BP	c116963.graph_c0;c126590.graph_c1;c132488.graph_c0;c137368.graph_c1;c138381.graph_c0
GO:0009581	detection of external stimulus	1	0.02434	BP	c134910.graph_c4
GO:0009582	detection of abiotic stimulus	1	0.02434	BP	c134910.graph_c4
GO:0009944	polarity specification of adaxial/abaxial axis	1	0.02439	BP	c88560.graph_c0
GO:0000413	protein peptidyl-prolyl isomerization	10	0.02471	BP	c123290.graph_c0;c126562.graph_c0;c127616.graph_c0;c129365.graph_c0;c130497.graph_c0;c131712.graph_c1;c131798.graph_c0;c135286.graph_c0;c135328.graph_c0;c138204.graph_c0
GO:0034470	ncRNA processing	17	0.02567	BP	c112150.graph_c0;c113874.graph_c0;c117513.graph_c0;c120463.graph_c0;c124100.graph_c0;c125679.graph_c0;c126814.graph_c0;c127273.graph_c0;c127602.graph_c0;c127950.graph_c0;c128948.graph_c0;c129114.graph_c0;c132028.graph_c1;c132597.graph_c0;c134942.graph_c0;c137713.graph_c0;c90513.graph_c0
GO:0009611	response to wounding	2	0.02628	BP	c132421.graph_c0;c136093.graph_c2
GO:0006817	phosphate ion transport	10	0.02691	BP	c116428.graph_c0;c116428.graph_c1;c117657.graph_c0;c121716.graph_c2;c121716.graph_c3;c121716.graph_c4;c131606.graph_c0;c132487.graph_c1;c133914.graph_c0;c133914.graph_c1
GO:0048864	stem cell development	2	0.0271	BP	c122879.graph_c0;c128218.graph_c0
GO:0019827	stem cell maintenance	2	0.0271	BP	c122879.graph_c0;c128218.graph_c0
GO:0010074	maintenance of meristem identity	2	0.0271	BP	c122879.graph_c0;c128218.graph_c0
GO:0046274	lignin catabolic process	7	0.0274	BP	c116265.graph_c0;c123523.graph_c0;c131292.graph_c0;c131292.graph_c1;c136104.graph_c0;c68993.graph_c0;c97583.graph_c0
GO:0045488	pectin metabolic process	25	0.0276	BP	c104257.graph_c0;c109240.graph_c0;c113909.graph_c0;c116525.graph_c0;c117515.graph_c0;c119632.graph_c0;c119853.graph_c0;c121515.graph_c0;c122320.graph_c0;c122875.graph_c0;c122875.graph_c1;c122875.graph_c2;c123241.graph_c0;c124079.graph_c0;c128318.graph_c0;c129689.graph_c1;c130429.graph_c0;c130954.graph_c0;c132288.graph_c2;c134575.graph_c0;c138648.graph_c0;c88105.graph_c0;c91769.graph_c0;c91769.gra…
GO:0010393	galacturonan metabolic process	25	0.0276	BP	c104257.graph_c0;c109240.graph_c0;c113909.graph_c0;c116525.graph_c0;c117515.graph_c0;c119632.graph_c0;c119853.graph_c0;c121515.graph_c0;c122320.graph_c0;c122875.graph_c0;c122875.graph_c1;c122875.graph_c2;c123241.graph_c0;c124079.graph_c0;c128318.graph_c0;c129689.graph_c1;c130429.graph_c0;c130954.graph_c0;c132288.graph_c2;c134575.graph_c0;c138648.graph_c0;c88105.graph_c0;c91769.graph_c0;c91769.gra…
GO:0006596	polyamine biosynthetic process	7	0.02833	BP	c111526.graph_c0;c115486.graph_c0;c121265.graph_c0;c125257.graph_c0;c133408.graph_c0;c67808.graph_c0;c83064.graph_c0
GO:0048608	reproductive structure development	47	0.02864	BP	c101622.graph_c0;c105018.graph_c0;c110712.graph_c0;c112098.graph_c0;c113220.graph_c0;c113650.graph_c0;c115901.graph_c0;c116183.graph_c0;c117906.graph_c0;c117956.graph_c1;c118584.graph_c0;c118777.graph_c0;c120548.graph_c0;c120671.graph_c0;c120718.graph_c0;c121422.graph_c0;c121805.graph_c0;c122275.graph_c0;c122879.graph_c0;c123108.graph_c0;c123962.graph_c0;c124909.graph_c3;c125214.graph_c0;c125312.…
GO:0061458	reproductive system development	47	0.02864	BP	c101622.graph_c0;c105018.graph_c0;c110712.graph_c0;c112098.graph_c0;c113220.graph_c0;c113650.graph_c0;c115901.graph_c0;c116183.graph_c0;c117906.graph_c0;c117956.graph_c1;c118584.graph_c0;c118777.graph_c0;c120548.graph_c0;c120671.graph_c0;c120718.graph_c0;c121422.graph_c0;c121805.graph_c0;c122275.graph_c0;c122879.graph_c0;c123108.graph_c0;c123962.graph_c0;c124909.graph_c3;c125214.graph_c0;c125312.…
GO:0072488	ammonium transmembrane transport	2	0.02876	BP	c139838.graph_c0;c83002.graph_c1
GO:0071407	cellular response to organic cyclic compound	9	0.0289	BP	c101622.graph_c0;c120570.graph_c0;c121924.graph_c0;c127273.graph_c0;c131346.graph_c1;c131346.graph_c2;c131660.graph_c0;c132028.graph_c1;c134370.graph_c0
GO:0015696	ammonium transport	3	0.02891	BP	c131978.graph_c0;c139838.graph_c0;c83002.graph_c1
GO:0046283	anthocyanin-containing compound metabolic process	1	0.02924	BP	c133288.graph_c2
GO:0031407	oxylipin metabolic process	1	0.03035	BP	c116625.graph_c0
GO:0010315	auxin efflux	2	0.03113	BP	c128609.graph_c0;c138381.graph_c0
GO:0009798	axis specification	4	0.03147	BP	c111536.graph_c0;c116183.graph_c0;c88560.graph_c0;c95666.graph_c0
GO:0010413	glucuronoxylan metabolic process	1	0.03151	BP	c127160.graph_c1
GO:0031054	pre-miRNA processing	2	0.03203	BP	c127273.graph_c0;c132028.graph_c1
GO:0010222	stem vascular tissue pattern formation	2	0.0325	BP	c128587.graph_c0;c132421.graph_c0
GO:0042446	hormone biosynthetic process	8	0.0325	BP	c103294.graph_c0;c104356.graph_c0;c114108.graph_c0;c117105.graph_c0;c125682.graph_c0;c126590.graph_c1;c131956.graph_c0;c133876.graph_c0
GO:0006090	pyruvate metabolic process	33	0.03255	BP	c110452.graph_c2;c113536.graph_c0;c114725.graph_c0;c116760.graph_c0;c116760.graph_c2;c120728.graph_c0;c121805.graph_c0;c122583.graph_c2;c123256.graph_c0;c123483.graph_c0;c124857.graph_c0;c125899.graph_c0;c126851.graph_c1;c129438.graph_c1;c129895.graph_c0;c130638.graph_c0;c131478.graph_c1;c132010.graph_c0;c133110.graph_c0;c133267.graph_c0;c133999.graph_c0;c134129.graph_c0;c134924.graph_c0;c136746.…
GO:0009642	response to light intensity	3	0.03277	BP	c126987.graph_c1;c128754.graph_c0;c134948.graph_c0
GO:0042548	regulation of photosynthesis, light reaction	3	0.03291	BP	c126987.graph_c1;c134948.graph_c0;c136893.graph_c0
GO:0030855	epithelial cell differentiation	14	0.03301	BP	c101457.graph_c0;c105018.graph_c0;c106430.graph_c0;c116465.graph_c0;c116821.graph_c0;c120951.graph_c0;c122685.graph_c0;c127743.graph_c0;c131874.graph_c1;c136689.graph_c2;c138924.graph_c0;c139058.graph_c0;c67862.graph_c1;c94866.graph_c0
GO:0009913	epidermal cell differentiation	14	0.03301	BP	c101457.graph_c0;c105018.graph_c0;c106430.graph_c0;c116465.graph_c0;c116821.graph_c0;c120951.graph_c0;c122685.graph_c0;c127743.graph_c0;c131874.graph_c1;c136689.graph_c2;c138924.graph_c0;c139058.graph_c0;c67862.graph_c1;c94866.graph_c0
GO:1990069	stomatal opening	1	0.03313	BP	c127626.graph_c0
GO:0035195	gene silencing by miRNA	2	0.03313	BP	c127273.graph_c0;c132028.graph_c1
GO:1900140	regulation of seedling development	3	0.03402	BP	c101622.graph_c0;c128525.graph_c0;c135597.graph_c0
GO:0010029	regulation of seed germination	3	0.03402	BP	c101622.graph_c0;c128525.graph_c0;c135597.graph_c0
GO:0009612	response to mechanical stimulus	2	0.03518	BP	c125814.graph_c0;c134910.graph_c4
GO:0032787	monocarboxylic acid metabolic process	119	0.03529	BP	c100354.graph_c0;c100963.graph_c0;c102823.graph_c2;c106997.graph_c0;c107483.graph_c0;c110452.graph_c2;c112171.graph_c0;c112311.graph_c0;c112311.graph_c1;c113536.graph_c0;c113684.graph_c0;c113684.graph_c2;c113776.graph_c1;c114725.graph_c0;c115353.graph_c0;c115522.graph_c0;c115522.graph_c1;c116625.graph_c0;c116628.graph_c0;c116760.graph_c0;c116760.graph_c2;c116940.graph_c0;c116940.graph_c1;c117080.…
GO:0048598	embryonic morphogenesis	2	0.03539	BP	c128525.graph_c0;c131824.graph_c0
GO:0010224	response to UV-B	1	0.03547	BP	c128646.graph_c0
GO:0032973	amino acid export	2	0.03554	BP	c123505.graph_c0;c135128.graph_c1
GO:0048544	recognition of pollen	4	0.03622	BP	c127889.graph_c0;c134787.graph_c1;c136201.graph_c0;c136494.graph_c2
GO:0008037	cell recognition	4	0.03622	BP	c127889.graph_c0;c134787.graph_c1;c136201.graph_c0;c136494.graph_c2
GO:0015716	organic phosphonate transport	4	0.03628	BP	c119968.graph_c0;c127376.graph_c0;c132421.graph_c0;c135563.graph_c1
GO:0080163	regulation of protein serine/threonine phosphatase activity	4	0.03653	BP	c116370.graph_c0;c122115.graph_c0;c122306.graph_c0;c127545.graph_c1
GO:0009833	primary cell wall biogenesis	1	0.03673	BP	c133457.graph_c0
GO:0071446	cellular response to salicylic acid stimulus	2	0.03713	BP	c101622.graph_c0;c121924.graph_c0
GO:0009863	salicylic acid mediated signaling pathway	2	0.03713	BP	c101622.graph_c0;c121924.graph_c0
GO:0010016	shoot system morphogenesis	15	0.03713	BP	c116465.graph_c0;c116821.graph_c0;c124504.graph_c1;c126962.graph_c0;c127743.graph_c0;c131824.graph_c0;c132172.graph_c1;c132891.graph_c0;c132891.graph_c1;c134634.graph_c3;c138924.graph_c0;c67944.graph_c0;c68379.graph_c0;c80885.graph_c0;c88560.graph_c0
GO:0009292	genetic transfer	2	0.03737	BP	c133011.graph_c0;c136744.graph_c1
GO:0009294	DNA mediated transformation	2	0.03737	BP	c133011.graph_c0;c136744.graph_c1
GO:0009821	alkaloid biosynthetic process	4	0.03737	BP	c101307.graph_c0;c133434.graph_c0;c137131.graph_c0;c83971.graph_c0
GO:0010053	root epidermal cell differentiation	3	0.0374	BP	c101457.graph_c0;c106430.graph_c0;c67862.graph_c1
GO:0009636	response to toxic substance	2	0.03773	BP	c122104.graph_c0;c88141.graph_c0
GO:0006813	potassium ion transport	16	0.03806	BP	c104850.graph_c0;c104850.graph_c1;c112593.graph_c0;c120967.graph_c0;c122583.graph_c1;c123541.graph_c1;c125704.graph_c0;c125906.graph_c0;c125906.graph_c1;c128208.graph_c0;c132351.graph_c0;c133030.graph_c0;c134520.graph_c4;c135928.graph_c0;c136076.graph_c0;c136393.graph_c2
GO:0010310	regulation of hydrogen peroxide metabolic process	1	0.03817	BP	c132205.graph_c0
GO:0006595	polyamine metabolic process	7	0.03845	BP	c111526.graph_c0;c115486.graph_c0;c121265.graph_c0;c125257.graph_c0;c133408.graph_c0;c67808.graph_c0;c83064.graph_c0
GO:0030837	negative regulation of actin filament polymerization	1	0.0387	BP	c110641.graph_c0
GO:0032272	negative regulation of protein polymerization	1	0.0387	BP	c110641.graph_c0
GO:0045489	pectin biosynthetic process	3	0.0391	BP	c116525.graph_c0;c134575.graph_c0;c88105.graph_c0
GO:0032350	regulation of hormone metabolic process	2	0.03948	BP	c126590.graph_c1;c138381.graph_c0
GO:0090354	regulation of auxin metabolic process	2	0.03948	BP	c126590.graph_c1;c138381.graph_c0
GO:0021700	developmental maturation	4	0.03959	BP	c101457.graph_c0;c120671.graph_c0;c128172.graph_c0;c67862.graph_c1
GO:0090480	purine nucleotide-sugar transmembrane transport	2	0.03972	BP	c115857.graph_c0;c138691.graph_c0
GO:0036079	purine nucleotide-sugar transport	2	0.03972	BP	c115857.graph_c0;c138691.graph_c0
GO:0098661	inorganic anion transmembrane transport	4	0.03982	BP	c121716.graph_c2;c121716.graph_c4;c139838.graph_c0;c83002.graph_c1
GO:0045683	negative regulation of epidermis development	2	0.03995	BP	c116465.graph_c0;c138924.graph_c0
GO:2000122	negative regulation of stomatal complex development	2	0.03995	BP	c116465.graph_c0;c138924.graph_c0
GO:0046835	carbohydrate phosphorylation	6	0.04046	BP	c101880.graph_c0;c111380.graph_c0;c122476.graph_c0;c123256.graph_c0;c133999.graph_c0;c137698.graph_c0
GO:0016556	mRNA modification	2	0.04107	BP	c127198.graph_c1;c129048.graph_c0
GO:0090332	stomatal closure	2	0.04145	BP	c125038.graph_c0;c136393.graph_c2
GO:0046351	disaccharide biosynthetic process	5	0.04174	BP	c120383.graph_c0;c126198.graph_c0;c129791.graph_c0;c130652.graph_c0;c136222.graph_c0
GO:0060919	auxin influx	2	0.04186	BP	c128609.graph_c0;c70211.graph_c0
GO:0042391	regulation of membrane potential	2	0.04201	BP	c133030.graph_c0;c134520.graph_c4
GO:0035266	meristem growth	5	0.04217	BP	c110712.graph_c0;c121422.graph_c0;c133004.graph_c0;c138712.graph_c0;c80611.graph_c0
GO:0010450	inflorescence meristem growth	2	0.0422	BP	c138712.graph_c0;c80611.graph_c0
GO:0010159	specification of organ position	2	0.0422	BP	c138712.graph_c0;c80611.graph_c0
GO:0009914	hormone transport	12	0.04225	BP	c120312.graph_c0;c120312.graph_c2;c122054.graph_c0;c128609.graph_c0;c128646.graph_c0;c131824.graph_c0;c136174.graph_c2;c138381.graph_c0;c67808.graph_c0;c67862.graph_c1;c70211.graph_c0;c81468.graph_c0
GO:0060918	auxin transport	12	0.04225	BP	c120312.graph_c0;c120312.graph_c2;c122054.graph_c0;c128609.graph_c0;c128646.graph_c0;c131824.graph_c0;c136174.graph_c2;c138381.graph_c0;c67808.graph_c0;c67862.graph_c1;c70211.graph_c0;c81468.graph_c0
GO:0006269	DNA replication, synthesis of RNA primer	2	0.04231	BP	c104001.graph_c0;c81087.graph_c0
GO:0000710	meiotic mismatch repair	2	0.04272	BP	c132108.graph_c0;c133915.graph_c0
GO:0048466	androecium development	4	0.04328	BP	c112098.graph_c0;c122879.graph_c0;c125214.graph_c0;c128609.graph_c0
GO:0048443	stamen development	4	0.04328	BP	c112098.graph_c0;c122879.graph_c0;c125214.graph_c0;c128609.graph_c0
GO:0051707	response to other organism	23	0.04332	BP	c108625.graph_c0;c113973.graph_c0;c116628.graph_c0;c118196.graph_c0;c118557.graph_c0;c119100.graph_c0;c124853.graph_c0;c128525.graph_c0;c131161.graph_c0;c131660.graph_c0;c132205.graph_c0;c133255.graph_c1;c133399.graph_c0;c134982.graph_c1;c135597.graph_c0;c136093.graph_c2;c137131.graph_c0;c138080.graph_c0;c75324.graph_c0;c75446.graph_c0;c83063.graph_c0;c86432.graph_c0;c88560.graph_c0
GO:0043207	response to external biotic stimulus	23	0.04332	BP	c108625.graph_c0;c113973.graph_c0;c116628.graph_c0;c118196.graph_c0;c118557.graph_c0;c119100.graph_c0;c124853.graph_c0;c128525.graph_c0;c131161.graph_c0;c131660.graph_c0;c132205.graph_c0;c133255.graph_c1;c133399.graph_c0;c134982.graph_c1;c135597.graph_c0;c136093.graph_c2;c137131.graph_c0;c138080.graph_c0;c75324.graph_c0;c75446.graph_c0;c83063.graph_c0;c86432.graph_c0;c88560.graph_c0
GO:0003032	detection of oxygen	1	0.04345	BP	c124922.graph_c0
GO:0009061	anaerobic respiration	1	0.04345	BP	c124922.graph_c0
GO:0018171	peptidyl-cysteine oxidation	1	0.04345	BP	c124922.graph_c0
GO:0070483	detection of hypoxia	1	0.04345	BP	c124922.graph_c0
GO:0048582	positive regulation of post-embryonic development	4	0.04352	BP	c121805.graph_c0;c130013.graph_c1;c135597.graph_c0;c135654.graph_c0
GO:0051240	positive regulation of multicellular organismal process	4	0.04352	BP	c121805.graph_c0;c130013.graph_c1;c135597.graph_c0;c135654.graph_c0
GO:0048825	cotyledon development	2	0.04355	BP	c131824.graph_c0;c67862.graph_c1
GO:1902222	erythrose 4-phosphate/phosphoenolpyruvate family amino acid catabolic process	6	0.04363	BP	c100354.graph_c0;c119273.graph_c0;c125063.graph_c4;c131372.graph_c0;c137696.graph_c0;c67873.graph_c0
GO:0006559	L-phenylalanine catabolic process	6	0.04363	BP	c100354.graph_c0;c119273.graph_c0;c125063.graph_c4;c131372.graph_c0;c137696.graph_c0;c67873.graph_c0
GO:0010338	leaf formation	2	0.04366	BP	c131824.graph_c0;c134634.graph_c3
GO:0031050	dsRNA fragmentation	3	0.04413	BP	c127273.graph_c0;c131660.graph_c0;c132028.graph_c1
GO:0070918	production of small RNA involved in gene silencing by RNA	3	0.04413	BP	c127273.graph_c0;c131660.graph_c0;c132028.graph_c1
GO:0071359	cellular response to dsRNA	3	0.04413	BP	c127273.graph_c0;c131660.graph_c0;c132028.graph_c1
GO:0043331	response to dsRNA	3	0.04413	BP	c127273.graph_c0;c131660.graph_c0;c132028.graph_c1
GO:0051552	flavone metabolic process	4	0.04469	BP	c112245.graph_c0;c124026.graph_c1;c133288.graph_c2;c138081.graph_c0
GO:0051553	flavone biosynthetic process	4	0.04469	BP	c112245.graph_c0;c124026.graph_c1;c133288.graph_c2;c138081.graph_c0
GO:0010025	wax biosynthetic process	4	0.04511	BP	c102823.graph_c2;c125334.graph_c1;c126647.graph_c0;c138279.graph_c0
GO:0010166	wax metabolic process	4	0.04511	BP	c102823.graph_c2;c125334.graph_c1;c126647.graph_c0;c138279.graph_c0
GO:0008033	tRNA processing	6	0.04512	BP	c117513.graph_c0;c120463.graph_c0;c124100.graph_c0;c132597.graph_c0;c137713.graph_c0;c90513.graph_c0
GO:0015995	chlorophyll biosynthetic process	3	0.04519	BP	c117513.graph_c0;c121767.graph_c0;c123815.graph_c0
GO:0019682	glyceraldehyde-3-phosphate metabolic process	3	0.04572	BP	c123483.graph_c0;c136746.graph_c3;c98418.graph_c0
GO:0048829	root cap development	3	0.04747	BP	c121723.graph_c0;c131514.graph_c2;c70211.graph_c0
GO:0046445	benzyl isoquinoline alkaloid metabolic process	1	0.04752	BP	c137131.graph_c0
GO:1901010	(S)-reticuline metabolic process	1	0.04752	BP	c137131.graph_c0
GO:1901012	(S)-reticuline biosynthetic process	1	0.04752	BP	c137131.graph_c0
GO:0009708	benzyl isoquinoline alkaloid biosynthetic process	1	0.04752	BP	c137131.graph_c0
GO:0006346	methylation-dependent chromatin silencing	1	0.04766	BP	c131652.graph_c0
GO:0043062	extracellular structure organization	2	0.04785	BP	c123653.graph_c0;c126037.graph_c0
GO:0071668	plant-type cell wall assembly	2	0.04785	BP	c123653.graph_c0;c126037.graph_c0
GO:0030198	extracellular matrix organization	2	0.04785	BP	c123653.graph_c0;c126037.graph_c0
GO:0010215	cellulose microfibril organization	2	0.04785	BP	c123653.graph_c0;c126037.graph_c0
GO:0009637	response to blue light	4	0.04808	BP	c122081.graph_c0;c128609.graph_c0;c128754.graph_c0;c135654.graph_c0
GO:0006096	glycolytic process	28	0.04907	BP	c110452.graph_c2;c113536.graph_c0;c114725.graph_c0;c116760.graph_c0;c116760.graph_c2;c121805.graph_c0;c122583.graph_c2;c123256.graph_c0;c124857.graph_c0;c125899.graph_c0;c126851.graph_c1;c129895.graph_c0;c130638.graph_c0;c131478.graph_c1;c132010.graph_c0;c133110.graph_c0;c133267.graph_c0;c133999.graph_c0;c134924.graph_c0;c136792.graph_c0;c137193.graph_c0;c137577.graph_c0;c137689.graph_c0;c138410.…
GO:0031425	chloroplast RNA processing	5	0.04955	BP	c117369.graph_c0;c127190.graph_c0;c130902.graph_c0;c136546.graph_c0;c83470.graph_c0
GO:0044550	secondary metabolite biosynthetic process	42	0.04967	BP	c100354.graph_c0;c100905.graph_c0;c105072.graph_c0;c107374.graph_c0;c109918.graph_c0;c109918.graph_c1;c110642.graph_c0;c113197.graph_c0;c114744.graph_c0;c115829.graph_c1;c119914.graph_c0;c120013.graph_c0;c120671.graph_c0;c121631.graph_c1;c123042.graph_c0;c123523.graph_c0;c124026.graph_c1;c124632.graph_c0;c125063.graph_c4;c125975.graph_c0;c127376.graph_c0;c128556.graph_c0;c128654.graph_c1;c130183.…
GO:0006546	glycine catabolic process	5	0.0499	BP	c115897.graph_c0;c123251.graph_c0;c125325.graph_c0;c133526.graph_c0;c67882.graph_c1
