# Supplementary material for: Mining of candidate genes involved in the biosynthesis of dextrorotatory borneol in Cinnamomum burmannii by transcriptomic analysis on three chemotypes
Source: PeerJ. 2020 Jun 10;8:e9311. doi: 10.7717/peerj.9311 (PMC7293187; doi:10.7717/peerj.9311)
Supplement: Data S10 [file peerj-08-9311-s010.xlsx]

## Sheet: Sheet1
Unigene_ID	Rename	FPKM			KEGG annotation
		HBT	LBT	NBT
c126058.graph_c0	CbDXS_1	139.28	87.11	155.28	K01662|0|egu:105035100|K01662 1-deoxy-D-xylulose-5-phosphate synthase [EC:2.2.1.7] | (RefSeq) probable 1-deoxy-D-xylulose-5-phosphate synthase, chloroplastic
c129570.graph_c0	CbDXS_2	6.97	11.87	6.85	K01662|0|nnu:104595318|K01662 1-deoxy-D-xylulose-5-phosphate synthase [EC:2.2.1.7] | (RefSeq) probable 1-deoxy-D-xylulose-5-phosphate synthase, chloroplastic
c134634.graph_c0	CbDXS_3	24.14	30.38	16.89	K01662|0|rcu:8277645|K01662 1-deoxy-D-xylulose-5-phosphate synthase [EC:2.2.1.7] | (RefSeq) probable 1-deoxy-D-xylulose-5-phosphate synthase 2, chloroplastic
c165316.graph_c0	CbDXS_4	0	2.14	0	K01662|1.21845e-47|csl:COCSUDRAFT_16525|K01662 1-deoxy-D-xylulose-5-phosphate synthase [EC:2.2.1.7] | (RefSeq) 1-deoxy-D-xylulose 5-phosphate synthase
c104037.graph_c1	CbDXS_5	5.27	1.75	3.67	K01662|1.2835e-109|jcu:105628480|K01662 1-deoxy-D-xylulose-5-phosphate synthase [EC:2.2.1.7] | (RefSeq) probable 1-deoxy-D-xylulose-5-phosphate synthase 2, chloroplastic
c112210.graph_c0	CbDXS_6	5.3	2.58	3.57	K01662|2.32406e-119|fve:101306182|K01662 1-deoxy-D-xylulose-5-phosphate synthase [EC:2.2.1.7] | (RefSeq) probable 1-deoxy-D-xylulose-5-phosphate synthase 2, chloroplastic
c134634.graph_c2	CbDXS_7	29.2	33.06	20.11	K01662|2.46784e-142|jcu:105628480|K01662 1-deoxy-D-xylulose-5-phosphate synthase [EC:2.2.1.7] | (RefSeq) probable 1-deoxy-D-xylulose-5-phosphate synthase 2, chloroplastic
c182628.graph_c0	CbDXS_8	0	2.21	0	K01662|2.5778e-29|csl:COCSUDRAFT_16525|K01662 1-deoxy-D-xylulose-5-phosphate synthase [EC:2.2.1.7] | (RefSeq) 1-deoxy-D-xylulose 5-phosphate synthase
c104037.graph_c0	CbDXS_9	5.36	1.63	0.95	K01662|3.23524e-06|adu:107480979|K01662 1-deoxy-D-xylulose-5-phosphate synthase [EC:2.2.1.7] | (RefSeq) probable 1-deoxy-D-xylulose-5-phosphate synthase 2, chloroplastic
c128011.graph_c3	CbDXS_10	1.96	1.11	1	K01662|4.82364e-10|gmx:100786607|K01662 1-deoxy-D-xylulose-5-phosphate synthase [EC:2.2.1.7] | (RefSeq) probable 1-deoxy-D-xylulose-5-phosphate synthase 2, chloroplastic
c128011.graph_c0	CbDXS_11	1.7	0.8	1.08	K01662|7.05047e-63|jcu:105628480|K01662 1-deoxy-D-xylulose-5-phosphate synthase [EC:2.2.1.7] | (RefSeq) probable 1-deoxy-D-xylulose-5-phosphate synthase 2, chloroplastic
c84883.graph_c0	CbDXR	66.24	36.4	70.52	K00099|0|pda:103705855|K00099 1-deoxy-D-xylulose-5-phosphate reductoisomerase [EC:1.1.1.267] | (RefSeq) 1-deoxy-D-xylulose 5-phosphate reductoisomerase, chloroplastic
c179862.graph_c0	CbMCT_1	0	2.03	0	K00991|1.00347e-30|csl:COCSUDRAFT_35670|K00991 2-C-methyl-D-erythritol 4-phosphate cytidylyltransferase [EC:2.7.7.60] | (RefSeq) 2-C-methyl-D-erythritol 4-phosphate cy
c124628.graph_c0	CbMCT_2	8.9	22.28	10.24	K00991|1.15668e-72|cam:101493955|K00991 2-C-methyl-D-erythritol 4-phosphate cytidylyltransferase [EC:2.7.7.60] | (RefSeq) 2-C-methyl-D-erythritol 4-phosphate cytidylyltransferase, chloroplastic
c120217.graph_c0	CbCMK	17.01	31.95	17.09	K00919|0|nnu:104593647|K00919 4-diphosphocytidyl-2-C-methyl-D-erythritol kinase [EC:2.7.1.148] | (RefSeq) 4-diphosphocytidyl-2-C-methyl-D-erythritol kinase, chloroplastic
c126639.graph_c1	CbMCS	164.48	224.09	145.33	K01770|9.96447e-104|pop:POPTR_0003s13230g|K01770 2-C-methyl-D-erythritol 2,4-cyclodiphosphate synthase [EC:4.6.1.12] | (RefSeq) POPTRDRAFT_1074087; hypothetical protein
c134509.graph_c0	CbHDS_1	75.96	190.34	74.19	K03526|0|nnu:104594845|K03526 (E)-4-hydroxy-3-methylbut-2-enyl-diphosphate synthase [EC:1.17.7.1 1.17.7.3] | (RefSeq) 4-hydroxy-3-methylbut-2-en-1-yl diphosphate synthase (ferredoxin), chloroplastic
c116137.graph_c0	CbHDS_2	22.9	43.47	23.08	K03526|1.79903e-107|nnu:104594845|K03526 (E)-4-hydroxy-3-methylbut-2-enyl-diphosphate synthase [EC:1.17.7.1 1.17.7.3] | (RefSeq) 4-hydroxy-3-methylbut-2-en-1-yl diphosphate synthase (ferredoxin), chloroplastic
c121089.graph_c0	CbHDR_	234.48	714.72	205.86	K03527|0|vvi:100267479|K03527 4-hydroxy-3-methylbut-2-en-1-yl diphosphate reductase [EC:1.17.7.4] | (RefSeq) 4-hydroxy-3-methylbut-2-enyl diphosphate reductase, chloroplastic
c196980.graph_c0	CbIPPI_1	0	1.25	0	K01823|2.74531e-35|mpp:MICPUCDRAFT_22570|K01823 isopentenyl-diphosphate Delta-isomerase [EC:5.3.3.2] | (RefSeq) IPI; isopentenyl-diphosphate delta-isomerase I
c104891.graph_c1	CbIPPI_2	30.95	38.73	40.84	K01823|3.68968e-52|mdm:103414031|K01823 isopentenyl-diphosphate Delta-isomerase [EC:5.3.3.2] | (RefSeq) isopentenyl-diphosphate Delta-isomerase I-like
c104891.graph_c0	CbIPPI_3	20.63	23.51	17.45	K01823|4.64898e-94|sot:102595093|K01823 isopentenyl-diphosphate Delta-isomerase [EC:5.3.3.2] | (RefSeq) isopentenyl-diphosphate Delta-isomerase I
c131463.graph_c0	CbIPPI_4	70.87	196.5	63.22	K01823|6.68044e-143|sind:105166860|K01823 isopentenyl-diphosphate Delta-isomerase [EC:5.3.3.2] | (RefSeq) isopentenyl-diphosphate Delta-isomerase I
c155347.graph_c0	CbIPPI_5	0	2.85	0	K01823|8.22554e-34|mpp:MICPUCDRAFT_22570|K01823 isopentenyl-diphosphate Delta-isomerase [EC:5.3.3.2] | (RefSeq) IPI; isopentenyl-diphosphate delta-isomerase I
c121767.graph_c0	CbGPPS_1	11.6	5.04	37.01	K10960|0|jcu:105629331|K10960 geranylgeranyl diphosphate/geranylgeranyl-bacteriochlorophyllide a reductase [EC:1.3.1.83 1.3.1.111] | (RefSeq) geranylgeranyl diphosphate reductase, chloroplastic-like
c135780.graph_c0	CbGPPS_2	369.24	323.19	330.43	K10960|0|sind:105157101|K10960 geranylgeranyl diphosphate/geranylgeranyl-bacteriochlorophyllide a reductase [EC:1.3.1.83 1.3.1.111] | (RefSeq) geranylgeranyl diphosphate reductase, chloroplastic
c81497.graph_c0	CbGPPS_3	0	0.93	0	K10960|2.14085e-90|cre:CHLREDRAFT_136810|K10960 geranylgeranyl diphosphate/geranylgeranyl-bacteriochlorophyllide a reductase [EC:1.3.1.83 1.3.1.111] | (RefSeq) geranylgeranyl reductase
c117513.graph_c0	CbGPPS_4	0	2.36	0	K10960|2.15804e-44|csl:COCSUDRAFT_31829|K10960 geranylgeranyl diphosphate/geranylgeranyl-bacteriochlorophyllide a reductase [EC:1.3.1.83 1.3.1.111] | (RefSeq) putative plastid geranylgeranyl reductase precursor
c117157.graph_c0	CbGPPS_5	27.92	35.92	12.24	K13789|5.79553e-118|jcu:105639597|K13789 geranylgeranyl diphosphate synthase, type II [EC:2.5.1.1 2.5.1.10 2.5.1.29] | (RefSeq) geranylgeranyl pyrophosphate synthase, chloroplastic
c133196.graph_c0	CbGPPS_6	17.28	11.58	18.85	K14066|1.19692e-14|egu:105059274|K14066 geranyl diphosphate synthase [EC:2.5.1.1] | (RefSeq) solanesyl-diphosphate synthase 1, mitochondrial
c150220.graph_c0	CbTPS1	0.85	0	0.2	K15095|2.95178e-27|sot:102582452|K15095 (+)-neomenthol dehydrogenase [EC:1.1.1.208] | (RefSeq) short-chain dehydrogenase/reductase 2b-like
c122670.graph_c0	CbTPS2	2690.23	1286.3	1172.42	Terpene synthase, N-terminal domain;; Terpene synthase family, metal binding domain;; Terpene synthase family, metal binding domain
c129067.graph_c0	CbTPS3	13.05	1.12	6.4	K15086|1.04791e-15|vvi:100854729|K15086 (3S)-linalool synthase [EC:4.2.3.25] | (RefSeq) probable terpene synthase 13
c108975.graph_c0	CbTPS4	0.67	0	2.27	K15086|1.04791e-15|vvi:100854729|K15086 (3S)-linalool synthase [EC:4.2.3.25] | (RefSeq) probable terpene synthase 13
c131093.graph_c2	CbTPS5	85.83	251.64	87.5	K15095|8.43386e-81|nnu:104608148|K15095 (+)-neomenthol dehydrogenase [EC:1.1.1.208] | (RefSeq) (+)-neomenthol dehydrogenase-like
c135974.graph_c3	CbTPS6	7.2	7.27	2.18	K15095|2.13619e-24|egu:105036292|K15095 (+)-neomenthol dehydrogenase [EC:1.1.1.208] | (RefSeq) (+)-neomenthol dehydrogenase
c152570.graph_c0	CbTPS7	0	3.66	0	K15095|1.36763e-08|thj:104817280|K15095 (+)-neomenthol dehydrogenase [EC:1.1.1.208] | (RefSeq) (+)-neomenthol dehydrogenase-like
c140690.graph_c0	CbTPS8	2.49	0	1.76	K15095|1.22175e-14|thj:104817280|K15095 (+)-neomenthol dehydrogenase [EC:1.1.1.208] | (RefSeq) (+)-neomenthol dehydrogenase-like
